# Supplementary material
Source: ML conference proceedings conference paper supplement (https://openreview.net/forum?id=oEtrDiFOFF)
Supplement: supplementary_material [file edgelist.xlsx]

## Sheet: Sheet1
american_water_spaniel.n.01	water_spaniel.n.01
addax.n.01	antelope.n.01
northern_pocket_gopher.n.01	gopher.n.04
komondor.n.01	shepherd_dog.n.01
silky_terrier.n.01	terrier.n.01
camel.n.01	even-toed_ungulate.n.01
two-toed_sloth.n.01	sloth.n.02
fanaloka.n.01	civet.n.01
wood_rabbit.n.01	rabbit.n.01
lemur.n.01	primate.n.02
jersey.n.05	dairy_cattle.n.01
crab-eating_raccoon.n.01	raccoon.n.02
freetail.n.01	carnivorous_bat.n.01
harbor_seal.n.01	earless_seal.n.01
working_dog.n.01	dog.n.01
puku.n.01	antelope.n.01
australian_sea_lion.n.01	sea_lion.n.01
genet.n.03	viverrine.n.01
meerkat.n.01	viverrine.n.01
paca.n.01	rodent.n.01
new_world_porcupine.n.01	porcupine.n.01
old_world_buffalo.n.01	bovid.n.01
wood_mouse.n.01	mouse.n.01
prairie_vole.n.01	vole.n.01
northern_bog_lemming.n.01	lemming.n.01
argali.n.01	wild_sheep.n.01
greyhound.n.01	hound.n.01
english_toy_spaniel.n.01	toy_spaniel.n.01
anoa.n.01	old_world_buffalo.n.01
viscacha.n.01	rodent.n.01
kit_fox.n.02	fox.n.01
common_dolphin.n.01	dolphin.n.02
liger.n.01	big_cat.n.01
afghan_hound.n.01	hound.n.01
mudder.n.01	racehorse.n.01
hognose_bat.n.01	leafnose_bat.n.01
longhorn.n.01	beef.n.01
kelpie.n.02	shepherd_dog.n.01
border_terrier.n.01	terrier.n.01
silverback.n.01	gorilla.n.01
common_zebra.n.01	zebra.n.01
blacktail_prairie_dog.n.01	prairie_dog.n.01
toy_spaniel.n.01	toy_dog.n.01
german_shepherd.n.01	shepherd_dog.n.01
thomson's_gazelle.n.01	gazelle.n.01
prancer.n.01	saddle_horse.n.01
timber_wolf.n.01	wolf.n.01
great_dane.n.01	working_dog.n.01
tamarin.n.01	marmoset.n.01
southeastern_pocket_gopher.n.01	gopher.n.04
dolphin.n.02	toothed_whale.n.01
burro.n.01	domestic_ass.n.01
shih-tzu.n.01	toy_dog.n.01
eland.n.01	antelope.n.01
talapoin.n.01	guenon.n.01
hog_badger.n.01	badger.n.02
mastiff.n.01	working_dog.n.01
tarsius_glis.n.01	tarsier.n.01
tasmanian_devil.n.01	dasyurid_marsupial.n.01
pug.n.01	dog.n.01
peccary.n.01	even-toed_ungulate.n.01
fox_terrier.n.01	terrier.n.01
toothed_whale.n.01	whale.n.02
doe.n.02	placental.n.01
aye-aye.n.01	lemur.n.01
fruit_bat.n.01	bat.n.01
greater_pichiciego.n.01	armadillo.n.01
cotswold.n.01	domestic_sheep.n.01
feist.n.01	cur.n.01
starnose_mole.n.01	mole.n.06
homo_sapiens_sapiens.n.01	homo_sapiens.n.01
eared_seal.n.01	seal.n.09
mangabey.n.01	old_world_monkey.n.01
scottish_deerhound.n.01	hound.n.01
domestic_cat.n.01	cat.n.01
sennenhunde.n.01	working_dog.n.01
old_english_sheepdog.n.01	shepherd_dog.n.01
duplicidentata.n.01	lagomorph.n.01
water_buffalo.n.01	old_world_buffalo.n.01
hartebeest.n.01	antelope.n.01
frosted_bat.n.01	vespertilian_bat.n.01
eurasian_badger.n.01	badger.n.02
cairn.n.02	terrier.n.01
ibizan_hound.n.01	hound.n.01
anthropoid.n.02	primate.n.02
brown_hyena.n.01	hyena.n.01
morgan.n.06	saddle_horse.n.01
platypus.n.01	monotreme.n.01
cashmere_goat.n.01	domestic_goat.n.01
bandicoot.n.01	marsupial.n.01
bluetick.n.01	hound.n.01
kiang.n.01	wild_ass.n.01
great_pyrenees.n.01	dog.n.01
grey_whale.n.01	baleen_whale.n.01
water_shrew.n.01	shrew.n.02
chamois.n.02	goat_antelope.n.01
short-tailed_shrew.n.01	shrew.n.02
belgian_hare.n.01	rabbit.n.01
stoat.n.01	ermine.n.02
bloodhound.n.01	hound.n.01
red_squirrel.n.02	tree_squirrel.n.01
tabby.n.02	domestic_cat.n.01
sivapithecus.n.01	hominid.n.01
hooded_skunk.n.01	skunk.n.04
langur.n.01	old_world_monkey.n.01
watchdog.n.02	working_dog.n.01
american_saddle_horse.n.01	saddle_horse.n.01
spitz.n.01	dog.n.01
snake_muishond.n.01	muishond.n.01
world.n.08	homo.n.02
domestic_llama.n.01	llama.n.01
great_ape.n.01	anthropoid_ape.n.01
roebuck.n.01	roe_deer.n.01
cinnamon_bear.n.01	american_black_bear.n.01
gomphothere.n.01	elephant.n.01
kangaroo.n.01	marsupial.n.01
plains_pocket_gopher.n.01	gopher.n.04
red-backed_mouse.n.01	vole.n.01
angora.n.04	domestic_cat.n.01
bunny.n.02	rabbit.n.01
harness_horse.n.01	horse.n.01
common_opossum.n.01	opossum.n.02
beaked_whale.n.01	toothed_whale.n.01
pied_lemming.n.01	lemming.n.01
sambar.n.01	deer.n.01
sled_dog.n.01	working_dog.n.01
norfolk_terrier.n.01	terrier.n.01
wild_boar.n.01	swine.n.01
lesser_kudu.n.01	kudu.n.01
coach_horse.n.01	draft_horse.n.01
white_elephant.n.02	indian_elephant.n.01
chickeree.n.01	tree_squirrel.n.01
welsh_springer_spaniel.n.01	springer_spaniel.n.01
bullterrier.n.01	terrier.n.01
springbok.n.01	gazelle.n.01
california_sea_lion.n.01	sea_lion.n.01
workhorse.n.02	horse.n.01
hinny.n.01	equine.n.01
pacific_bottlenose_dolphin.n.01	bottlenose_dolphin.n.01
orangutan.n.01	great_ape.n.01
sassaby.n.01	antelope.n.01
palfrey.n.01	saddle_horse.n.01
field_spaniel.n.01	spaniel.n.01
mountain_zebra.n.01	zebra.n.01
spider_monkey.n.01	new_world_monkey.n.01
american_staffordshire_terrier.n.01	bullterrier.n.01
keeshond.n.01	spitz.n.01
hyena.n.01	canine.n.02
new_world_least_weasel.n.01	weasel.n.02
rottweiler.n.01	shepherd_dog.n.01
common_lynx.n.01	lynx.n.02
tree_shrew.n.01	placental.n.01
rodent.n.01	placental.n.01
bighorn.n.02	mountain_sheep.n.01
zoril.n.01	muishond.n.01
mongoose.n.01	viverrine.n.01
western_pipistrel.n.01	vespertilian_bat.n.01
metatherian.n.01	mammal.n.01
musk_ox.n.01	bovid.n.01
otter_shrew.n.01	insectivore.n.01
ferret_badger.n.01	badger.n.02
hare_wallaby.n.01	wallaby.n.01
guinea_pig.n.02	cavy.n.01
bernese_mountain_dog.n.01	sennenhunde.n.01
woolly_monkey.n.01	new_world_monkey.n.01
snowshoe_hare.n.01	hare.n.01
giant_schnauzer.n.01	schnauzer.n.01
stirk.n.01	cattle.n.01
american_red_squirrel.n.01	tree_squirrel.n.01
ant_bear.n.01	placental.n.01
otterhound.n.01	hound.n.01
sable.n.05	marten.n.01
dik-dik.n.01	antelope.n.01
western_big-eared_bat.n.01	long-eared_bat.n.01
snow_leopard.n.01	big_cat.n.01
horseshoe_bat.n.01	leafnose_bat.n.01
weasel.n.02	musteline_mammal.n.01
chestnut.n.06	horse.n.01
mara.n.02	rodent.n.01
jennet.n.01	ass.n.03
opossum.n.02	marsupial.n.01
musk_deer.n.01	deer.n.01
cryptoprocta.n.01	civet.n.01
rat_terrier.n.01	terrier.n.01
mylodontid.n.01	edentate.n.01
caracal.n.01	lynx.n.02
entlebucher.n.01	sennenhunde.n.01
unguiculate.n.01	placental.n.01
water_rat.n.03	rodent.n.01
hominid.n.01	primate.n.02
chow.n.03	spitz.n.01
rhodesian_man.n.01	homo.n.02
eurasian_otter.n.01	otter.n.02
mouflon.n.01	mountain_sheep.n.01
jaguarundi.n.01	wildcat.n.03
appaloosa.n.01	saddle_horse.n.01
lionet.n.01	lion.n.01
crabeater_seal.n.01	seal.n.09
squirrel_monkey.n.01	new_world_monkey.n.01
golden_hamster.n.01	hamster.n.01
ruminant.n.01	even-toed_ungulate.n.01
polar_hare.n.01	hare.n.01
dachshund.n.01	hunting_dog.n.01
suslik.n.01	ground_squirrel.n.02
liver-spotted_dalmatian.n.01	dalmatian.n.02
durham.n.02	beef.n.01
dinocerate.n.01	ungulate.n.01
plott_hound.n.01	hound.n.01
toy_dog.n.01	dog.n.01
lhasa.n.02	terrier.n.01
eastern_lowland_gorilla.n.01	gorilla.n.01
polecat.n.02	musteline_mammal.n.01
coondog.n.01	coonhound.n.01
white_whale.n.01	dolphin.n.02
phyllostomus_hastatus.n.01	leafnose_bat.n.01
staffordshire_bullterrier.n.01	bullterrier.n.01
european_water_shrew.n.01	water_shrew.n.01
pariah_dog.n.01	cur.n.01
neandertal_man.n.01	homo.n.02
english_foxhound.n.01	foxhound.n.01
kaffir_cat.n.01	wildcat.n.03
raccoon.n.02	procyonid.n.01
mastiff_bat.n.01	carnivorous_bat.n.01
atlantic_walrus.n.01	walrus.n.01
saluki.n.01	hound.n.01
water_vole.n.01	vole.n.01
coonhound.n.01	hound.n.01
river_otter.n.01	otter.n.02
serotine.n.01	vespertilian_bat.n.01
lynx.n.02	wildcat.n.03
nanny.n.02	goat.n.01
red_fox.n.02	fox.n.01
ocelot.n.01	wildcat.n.03
blue_point_siamese.n.01	siamese_cat.n.01
edentate.n.01	placental.n.01
jerboa_rat.n.01	rat.n.01
bandicoot_rat.n.01	rat.n.01
bison.n.01	bovid.n.01
blue_fox.n.01	arctic_fox.n.01
ground_sloth.n.01	megatherian.n.01
american_mink.n.01	mink.n.03
pinto.n.01	horse.n.01
groundhog.n.01	marmot.n.01
hudson_bay_collared_lemming.n.01	pied_lemming.n.01
ord_kangaroo_rat.n.01	kangaroo_rat.n.01
pichiciago.n.01	armadillo.n.01
terrier.n.01	hunting_dog.n.01
two-toed_sloth.n.02	sloth.n.02
lincoln.n.03	domestic_sheep.n.01
water_chevrotain.n.01	chevrotain.n.01
leporid.n.01	lagomorph.n.01
black_squirrel.n.01	tree_squirrel.n.01
procyonid.n.01	carnivore.n.01
shrew_mole.n.01	mole.n.06
blacktail_jackrabbit.n.01	jackrabbit.n.01
cactus_mouse.n.01	wood_mouse.n.01
eastern_cottontail.n.01	wood_rabbit.n.01
humpback.n.03	baleen_whale.n.01
primate.n.02	placental.n.01
gee-gee.n.01	horse.n.01
alley_cat.n.01	domestic_cat.n.01
american_bison.n.01	bison.n.01
police_dog.n.01	working_dog.n.01
pouched_mole.n.01	marsupial.n.01
chacma.n.01	baboon.n.01
royal.n.02	stag.n.02
zebra.n.01	equine.n.01
ewe.n.03	sheep.n.01
schnauzer.n.01	terrier.n.01
eurasian_hamster.n.01	hamster.n.01
sussex_spaniel.n.01	spaniel.n.01
irish_terrier.n.01	terrier.n.01
hearing_dog.n.01	working_dog.n.01
antelope.n.01	bovid.n.01
blackbuck.n.01	antelope.n.01
grivet.n.01	guenon.n.01
aardwolf.n.01	hyena.n.01
wolf_pup.n.01	wolf.n.01
rudapithecus.n.01	dryopithecine.n.01
african_elephant.n.01	elephant.n.01
indian_elephant.n.01	elephant.n.01
domestic_ass.n.01	ass.n.03
sausage_dog.n.01	dachshund.n.01
mountain_gorilla.n.01	gorilla.n.01
sand_cat.n.01	wildcat.n.03
forest_goat.n.01	bovid.n.01
whitetail_prairie_dog.n.01	prairie_dog.n.01
retriever.n.01	sporting_dog.n.01
lemming.n.01	rodent.n.01
vampire_bat.n.01	carnivorous_bat.n.01
steenbok.n.01	antelope.n.01
ox.n.01	bovine.n.01
walrus.n.01	pinniped_mammal.n.01
rhodesian_ridgeback.n.01	hunting_dog.n.01
boar.n.02	swine.n.01
sorrel.n.05	horse.n.01
mountain_goat.n.01	goat_antelope.n.01
poodle.n.01	dog.n.01
asiatic_flying_squirrel.n.01	squirrel.n.01
australopithecine.n.01	hominid.n.01
hooded_seal.n.01	earless_seal.n.01
moke.n.01	domestic_ass.n.01
chigetai.n.01	onager.n.02
spotted_hyena.n.01	hyena.n.01
gazelle.n.01	antelope.n.01
onager.n.02	wild_ass.n.01
llama.n.01	even-toed_ungulate.n.01
quarter_horse.n.01	saddle_horse.n.01
pinche.n.01	tamarin.n.01
takin.n.01	goat_antelope.n.01
chesapeake_bay_retriever.n.01	retriever.n.01
kitty.n.04	domestic_cat.n.01
brown_swiss.n.01	dairy_cattle.n.01
jumping_mouse.n.01	rodent.n.01
bassarisk.n.01	procyonid.n.01
striped_skunk.n.01	skunk.n.04
mole.n.06	insectivore.n.01
friesian.n.01	dairy_cattle.n.01
pacer.n.01	horse.n.01
guereza.n.01	colobus.n.01
gerenuk.n.01	antelope.n.01
palm_cat.n.01	civet.n.01
hispid_pocket_mouse.n.01	pocket_mouse.n.01
douroucouli.n.01	new_world_monkey.n.01
flying_mouse.n.01	flying_phalanger.n.01
fissipedia.n.01	placental.n.01
manatee.n.01	sea_cow.n.01
monotreme.n.01	prototherian.n.01
american_harvest_mouse.n.01	new_world_mouse.n.01
banded_palm_civet.n.01	civet.n.01
right_whale.n.01	baleen_whale.n.01
otter.n.02	musteline_mammal.n.01
markhor.n.01	wild_goat.n.01
cardigan.n.02	corgi.n.01
zinjanthropus.n.01	australopithecine.n.01
bettong.n.01	rat_kangaroo.n.01
gorilla.n.01	great_ape.n.01
pygmy_marmoset.n.01	marmoset.n.01
norwegian_elkhound.n.01	hound.n.01
bactrian_camel.n.01	camel.n.01
paranthropus.n.01	australopithecine.n.01
tibetan_mastiff.n.01	mastiff.n.01
french_bulldog.n.01	bulldog.n.01
arabian.n.02	saddle_horse.n.01
flying_lemur.n.01	placental.n.01
elephant_seal.n.01	earless_seal.n.01
alaskan_brown_bear.n.01	brown_bear.n.01
numbat.n.01	dasyurid_marsupial.n.01
american_flying_squirrel.n.01	squirrel.n.01
plow_horse.n.01	workhorse.n.02
javanthropus.n.01	hominid.n.01
margay.n.01	wildcat.n.03
stepper.n.03	horse.n.01
wheel_horse.n.01	draft_horse.n.01
common_shrew.n.01	shrew.n.02
little_brown_bat.n.01	vespertilian_bat.n.01
pteropus_hypomelanus.n.01	fruit_bat.n.01
pine_vole.n.01	vole.n.01
guide_dog.n.01	working_dog.n.01
ibex.n.01	wild_goat.n.01
yorkshire_terrier.n.01	terrier.n.01
kangaroo_mouse.n.02	jerboa_rat.n.01
spouter.n.03	whale.n.02
silver_fox.n.01	red_fox.n.03
european_lemming.n.01	lemming.n.01
pocketed_bat.n.01	freetail.n.01
agouti.n.01	rodent.n.01
armadillo.n.01	edentate.n.01
welsh_pony.n.01	pony.n.05
woolly_indris.n.01	lemur.n.01
pangolin.n.01	placental.n.01
australopithecus_robustus.n.01	australopithecine.n.01
mammoth.n.01	elephant.n.01
harp_seal.n.01	earless_seal.n.01
rice_rat.n.01	rat.n.01
desmodus_rotundus.n.01	vampire_bat.n.01
dark_horse.n.02	racehorse.n.01
porcupine.n.01	rodent.n.01
chiacoan_peccary.n.01	peccary.n.01
field_mouse.n.02	mouse.n.01
glutton.n.02	musteline_mammal.n.01
leafnose_bat.n.01	carnivorous_bat.n.01
megatherian.n.01	edentate.n.01
lerot.n.01	dormouse.n.01
domestic_goat.n.01	goat.n.01
western_chimpanzee.n.01	chimpanzee.n.01
leveret.n.01	hare.n.01
australopithecus_boisei.n.01	australopithecine.n.01
homo_erectus.n.01	homo.n.02
european_hare.n.01	hare.n.01
indian_mongoose.n.01	mongoose.n.01
wisent.n.01	bison.n.01
ratel.n.01	musteline_mammal.n.01
yellow-throated_marten.n.01	marten.n.01
mylodon.n.01	edentate.n.01
welsh_terrier.n.01	wirehair.n.01
european_wildcat.n.01	wildcat.n.03
arabian_camel.n.01	camel.n.01
rabbit-eared_bandicoot.n.01	bandicoot.n.01
pony.n.01	horse.n.01
cotton_rat.n.01	rodent.n.01
green_monkey.n.01	guenon.n.01
japanese_spaniel.n.01	toy_dog.n.01
wapiti.n.01	deer.n.01
japanese_deer.n.01	deer.n.01
pouched_mouse.n.01	dasyurid_marsupial.n.01
tarsius_syrichta.n.01	tarsier.n.01
vole.n.01	wood_rat.n.01
toy_manchester.n.01	manchester_terrier.n.01
labrador_retriever.n.01	retriever.n.01
quagga.n.01	equine.n.01
swine.n.01	even-toed_ungulate.n.01
macrotus.n.01	leafnose_bat.n.01
peba.n.01	armadillo.n.01
whippet.n.01	greyhound.n.01
vixen.n.02	fox.n.01
greater_kudu.n.01	kudu.n.01
norwich_terrier.n.01	terrier.n.01
vicuna.n.03	even-toed_ungulate.n.01
wolverine.n.03	musteline_mammal.n.01
brittany_spaniel.n.01	spaniel.n.01
atlantic_bottlenose_dolphin.n.01	bottlenose_dolphin.n.01
brush-tailed_phalanger.n.01	phalanger.n.01
lesser_rorqual.n.01	rorqual.n.01
taguan.n.01	asiatic_flying_squirrel.n.01
nonstarter.n.02	racehorse.n.01
marten.n.01	musteline_mammal.n.01
meadow_jumping_mouse.n.01	jumping_mouse.n.01
tapir.n.01	odd-toed_ungulate.n.01
swamp_rabbit.n.02	wood_rabbit.n.01
south_american_sea_lion.n.01	sea_lion.n.01
crowbait.n.01	saddle_horse.n.01
black_rhinoceros.n.01	rhinoceros.n.01
australopithecus_afarensis.n.01	australopithecine.n.01
bird_dog.n.01	sporting_dog.n.01
eastern_grey_squirrel.n.01	tree_squirrel.n.01
gerbil.n.01	rodent.n.01
lapin.n.02	rabbit.n.01
aurochs.n.02	ox.n.02
manchester_terrier.n.01	rat_terrier.n.01
hippopotamus.n.01	even-toed_ungulate.n.01
marmot.n.01	rodent.n.01
gaur.n.01	asian_wild_ox.n.01
cow_pony.n.01	saddle_horse.n.01
pipistrelle.n.01	vespertilian_bat.n.01
cynocephalus_variegatus.n.01	flying_lemur.n.01
pricket.n.02	deer.n.01
bongo.n.02	antelope.n.01
capuchin.n.02	new_world_monkey.n.01
palomino.n.01	horse.n.01
gnu.n.01	antelope.n.01
corgi.n.01	dog.n.01
marco_polo_sheep.n.01	wild_sheep.n.01
macaque.n.01	old_world_monkey.n.01
saint_bernard.n.01	working_dog.n.01
deer_mouse.n.01	wood_mouse.n.01
asiatic_shrew_mole.n.01	shrew_mole.n.01
clumber.n.01	spaniel.n.01
brown_rat.n.01	rat.n.01
eastern_pipistrel.n.01	vespertilian_bat.n.01
hedgehog.n.02	insectivore.n.01
gemsbok.n.01	oryx.n.01
baboon.n.01	old_world_monkey.n.01
crab-eating_dog.n.01	wild_dog.n.01
finback.n.01	rorqual.n.01
patas.n.01	old_world_monkey.n.01
least_shrew.n.01	shrew.n.02
pine_marten.n.01	marten.n.01
pademelon.n.01	wallaby.n.01
borzoi.n.01	wolfhound.n.01
native_cat.n.01	dasyure.n.01
cotton_mouse.n.01	wood_mouse.n.01
polo_pony.n.01	horse.n.01
giant_eland.n.01	eland.n.01
central_chimpanzee.n.01	chimpanzee.n.01
cattle.n.01	bovine.n.01
mesohippus.n.01	horse.n.01
impala.n.01	antelope.n.01
gib.n.02	tom.n.02
appenzeller.n.01	sennenhunde.n.01
spotted_lynx.n.01	lynx.n.02
stablemate.n.01	horse.n.01
hamster.n.01	rodent.n.01
muskrat.n.02	rodent.n.01
red_wolf.n.01	wolf.n.01
raccoon_dog.n.01	wild_dog.n.01
serval.n.01	wildcat.n.03
shepherd_dog.n.01	working_dog.n.01
horseshoe_bat.n.02	leafnose_bat.n.01
yearling.n.03	placental.n.01
spearnose_bat.n.01	leafnose_bat.n.01
vaquita.n.01	porpoise.n.01
lapdog.n.01	dog.n.01
protohippus.n.01	horse.n.01
aperea.n.01	cavy.n.01
spotted_skunk.n.01	skunk.n.04
roan.n.02	horse.n.01
southern_bog_lemming.n.01	lemming.n.01
groenendael.n.01	belgian_sheepdog.n.01
cro-magnon.n.01	homo_sapiens.n.01
siamese_cat.n.01	domestic_cat.n.01
vizsla.n.01	pointer.n.04
naked_mole_rat.n.01	fossorial_mammal.n.01
shetland_pony.n.01	pony.n.05
marsh_hare.n.01	wood_rabbit.n.01
alaska_fur_seal.n.01	fur_seal.n.01
seizure-alert_dog.n.01	working_dog.n.01
fur_seal.n.02	eared_seal.n.01
barren_ground_caribou.n.01	caribou.n.01
mountain_nyala.n.01	antelope.n.01
hackney.n.02	harness_horse.n.01
lesser_ape.n.01	anthropoid_ape.n.01
water_vole.n.02	vole.n.01
babirusa.n.01	swine.n.01
murine.n.01	rodent.n.01
opossum_rat.n.01	marsupial.n.01
spaniel.n.01	sporting_dog.n.01
chihuahua.n.03	toy_dog.n.01
greater_swiss_mountain_dog.n.01	sennenhunde.n.01
large_civet.n.01	civet.n.01
prototherian.n.01	mammal.n.01
fallow_deer.n.01	deer.n.01
tatouay.n.01	armadillo.n.01
chipmunk.n.01	squirrel.n.01
rock_squirrel.n.01	ground_squirrel.n.02
collared_pika.n.01	pika.n.01
canine.n.02	carnivore.n.01
lion_cub.n.01	lion.n.01
fur_seal.n.01	eared_seal.n.01
kob.n.01	waterbuck.n.01
american_marten.n.01	marten.n.01
steller_sea_lion.n.01	sea_lion.n.01
pony.n.02	horse.n.01
deer.n.01	ruminant.n.01
malinois.n.01	belgian_sheepdog.n.01
cetacean.n.01	aquatic_mammal.n.01
european_rabbit.n.01	rabbit.n.01
colobus.n.01	old_world_monkey.n.01
tayra.n.01	musteline_mammal.n.01
pika.n.01	lagomorph.n.01
bruin.n.01	bear.n.01
saiga.n.01	antelope.n.01
old_world_monkey.n.01	monkey.n.01
brood_bitch.n.01	bitch.n.04
gazella_subgutturosa.n.01	gazelle.n.01
potto.n.02	lemur.n.01
hereford.n.01	beef.n.01
musk_kangaroo.n.01	kangaroo.n.01
aberdeen_angus.n.01	beef.n.01
phenacomys.n.01	vole.n.01
water_spaniel.n.01	spaniel.n.01
bottlenose_dolphin.n.01	dolphin.n.02
bovid.n.01	ruminant.n.01
western_grey_squirrel.n.01	tree_squirrel.n.01
ungulate.n.01	placental.n.01
yellowbelly_marmot.n.01	marmot.n.01
eastern_woodrat.n.01	wood_rat.n.01
rock_hyrax.n.01	hyrax.n.01
arctic_ground_squirrel.n.01	ground_squirrel.n.02
odd-toed_ungulate.n.01	ungulate.n.01
cavy.n.01	rodent.n.01
prosimian.n.01	primate.n.02
valley_pocket_gopher.n.01	gopher.n.04
giant_panda.n.01	procyonid.n.01
solo_man.n.01	homo_soloensis.n.01
chimpanzee.n.01	great_ape.n.01
wallaby.n.01	kangaroo.n.01
entellus.n.01	langur.n.01
walker_hound.n.01	foxhound.n.01
bottle-nosed_whale.n.01	beaked_whale.n.01
three-toed_sloth.n.01	sloth.n.02
male_horse.n.01	horse.n.01
shire.n.02	draft_horse.n.01
wire-haired_fox_terrier.n.01	fox_terrier.n.01
american_black_bear.n.01	bear.n.01
potoroo.n.01	rat_kangaroo.n.01
siamang.n.01	lesser_ape.n.01
heifer.n.01	cow.n.01
bear_cub.n.01	bear.n.01
beagle.n.01	hound.n.01
bronco.n.01	mustang.n.01
pony.n.05	horse.n.01
canada_porcupine.n.01	new_world_porcupine.n.01
prairie_dog.n.01	rodent.n.01
white-tailed_jackrabbit.n.01	jackrabbit.n.01
new_world_monkey.n.01	monkey.n.01
dhole.n.01	wild_dog.n.01
aquatic_mammal.n.01	placental.n.01
wildcat.n.03	cat.n.01
marmoset.n.01	new_world_monkey.n.01
dasyure.n.01	dasyurid_marsupial.n.01
woolly_rhinoceros.n.01	rhinoceros.n.01
plains_pocket_mouse.n.01	pocket_mouse.n.01
madagascar_cat.n.01	lemur.n.01
caribou.n.01	deer.n.01
leopardess.n.01	leopard.n.02
irish_setter.n.01	setter.n.02
antelope_squirrel.n.01	ground_squirrel.n.02
rat_kangaroo.n.01	kangaroo.n.01
bull_mastiff.n.01	working_dog.n.01
packhorse.n.01	workhorse.n.02
sable_antelope.n.01	antelope.n.01
sealyham_terrier.n.01	welsh_terrier.n.01
dinoceras.n.01	dinocerate.n.01
black-tailed_deer.n.01	mule_deer.n.01
english_setter.n.01	setter.n.02
small_civet.n.01	civet.n.01
percheron.n.01	draft_horse.n.01
bedlington_terrier.n.01	terrier.n.01
clydesdale.n.01	draft_horse.n.01
new_world_mouse.n.01	rodent.n.01
loir.n.01	dormouse.n.01
curly-coated_retriever.n.01	retriever.n.01
syrian_bear.n.01	brown_bear.n.01
fissiped_mammal.n.01	carnivore.n.01
homo_sapiens.n.01	homo.n.02
sea_otter.n.01	musteline_mammal.n.01
large_poodle.n.01	poodle.n.01
dusky-footed_woodrat.n.01	packrat.n.02
flying_phalanger.n.01	phalanger.n.01
indian_rhinoceros.n.01	rhinoceros.n.01
dugong.n.01	sea_cow.n.01
broodmare.n.01	mare.n.01
pointer.n.04	sporting_dog.n.01
africander.n.01	cattle.n.01
hind.n.02	red_deer.n.01
livestock.n.01	placental.n.01
tibetan_terrier.n.01	terrier.n.01
water_dog.n.02	sporting_dog.n.01
striped_hyena.n.01	hyena.n.01
red_fox.n.03	fox.n.01
mouse-eared_bat.n.01	carnivorous_bat.n.01
wild_ass.n.01	ass.n.03
porker.n.01	hog.n.03
lesser_panda.n.01	procyonid.n.01
pygmy_sperm_whale.n.01	toothed_whale.n.01
alpaca.n.03	llama.n.01
pronghorn.n.01	ruminant.n.01
slender_loris.n.01	lemur.n.01
gayal.n.01	asian_wild_ox.n.01
golden_mole.n.01	mole.n.06
smiledon_californicus.n.01	saber-toothed_tiger.n.01
wood_rat.n.01	rodent.n.01
koala.n.01	phalanger.n.01
abrocome.n.01	rodent.n.01
musteline_mammal.n.01	carnivore.n.01
newfoundland.n.01	dog.n.01
pygmy_chimpanzee.n.01	chimpanzee.n.01
tamarisk_gerbil.n.01	gerbil.n.01
nude_mouse.n.01	mouse.n.01
pygmy_mouse.n.01	wood_mouse.n.01
pocket_mouse.n.01	pocket_rat.n.01
ox.n.02	bovine.n.01
shrew.n.02	insectivore.n.01
sperm_whale.n.01	toothed_whale.n.01
redbone.n.01	hound.n.01
airedale.n.01	terrier.n.01
sei_whale.n.01	rorqual.n.01
proboscidean.n.01	placental.n.01
bullock.n.02	cattle.n.01
two-year-old_horse.n.01	racehorse.n.01
cuscus.n.01	phalanger.n.01
black-footed_ferret.n.01	musteline_mammal.n.01
american_shrew_mole.n.01	shrew_mole.n.01
australopithecus_africanus.n.01	australopithecine.n.01
standard_poodle.n.01	poodle.n.01
dalmatian.n.02	dog.n.01
goat_antelope.n.01	bovid.n.01
sand_rat.n.02	gerbil.n.01
jaguar.n.01	big_cat.n.01
tarsier.n.01	primate.n.02
bouvier_des_flandres.n.01	shepherd_dog.n.01
big-eared_bat.n.01	false_vampire.n.01
wild_horse.n.01	horse.n.01
red_poll.n.01	cattle.n.01
foxhound.n.01	hound.n.01
long-eared_bat.n.01	vespertilian_bat.n.01
farm_horse.n.01	workhorse.n.02
american_water_shrew.n.01	water_shrew.n.01
jird.n.01	gerbil.n.01
pocket_rat.n.01	rat.n.01
pteropus_capestratus.n.01	fruit_bat.n.01
hoary_marmot.n.01	marmot.n.01
dormouse.n.01	rodent.n.01
german_short-haired_pointer.n.01	pointer.n.04
boarhound.n.01	hound.n.01
collared_peccary.n.01	peccary.n.01
algeripithecus_minutus.n.01	hominoid.n.01
guadalupe_fur_seal.n.01	fur_seal.n.02
brown_bat.n.01	carnivorous_bat.n.01
billy.n.02	goat.n.01
sewer_rat.n.01	brown_rat.n.01
dall_sheep.n.01	wild_sheep.n.01
pinniped_mammal.n.01	aquatic_mammal.n.01
siberian_husky.n.01	sled_dog.n.01
common_wallaby.n.01	wallaby.n.01
giant_kangaroo.n.01	kangaroo.n.01
hog-nosed_skunk.n.01	skunk.n.04
housedog.n.01	watchdog.n.02
serow.n.01	goat_antelope.n.01
american_badger.n.01	badger.n.02
wild_dog.n.01	canine.n.02
asian_wild_ox.n.01	ox.n.02
feline.n.01	carnivore.n.01
sea_lion.n.01	eared_seal.n.01
baleen_whale.n.01	whale.n.02
lechwe.n.01	waterbuck.n.01
abyssinian.n.01	domestic_cat.n.01
black_fox.n.01	red_fox.n.03
collie.n.01	shepherd_dog.n.01
pallid_bat.n.01	vespertilian_bat.n.01
bucking_bronco.n.01	bronco.n.01
pentail.n.01	tree_shrew.n.01
pole_horse.n.02	draft_horse.n.01
cheetah.n.01	big_cat.n.01
grison.n.01	musteline_mammal.n.01
hart.n.03	red_deer.n.01
steeplechaser.n.01	horse.n.01
chinchilla.n.03	rodent.n.01
leopard_cat.n.01	wildcat.n.03
harvest_mouse.n.02	mouse.n.01
tree_wallaby.n.01	wallaby.n.01
bellwether.n.02	wether.n.01
pere_david's_deer.n.01	deer.n.01
tiger_cub.n.01	tiger.n.02
old_world_least_weasel.n.01	weasel.n.02
cavalry_horse.n.01	warhorse.n.03
silky_pocket_mouse.n.01	pocket_mouse.n.01
kit_fox.n.01	fox.n.01
dusky-footed_wood_rat.n.01	wood_rat.n.01
miniature_poodle.n.01	poodle.n.01
pilot_whale.n.01	dolphin.n.02
cynopterus_sphinx.n.01	fruit_bat.n.01
anthropoid_ape.n.01	ape.n.01
angwantibo.n.01	lemur.n.01
reynard.n.01	fox.n.01
woolly_mammoth.n.01	mammoth.n.01
saddle_horse.n.01	horse.n.01
bengal_tiger.n.01	tiger.n.02
affenpinscher.n.01	pinscher.n.01
aoudad.n.01	wild_sheep.n.01
phalanger.n.01	marsupial.n.01
vervet.n.01	guenon.n.01
bobcat.n.01	lynx.n.02
west_highland_white_terrier.n.01	terrier.n.01
earless_seal.n.01	seal.n.09
black-and-tan_coonhound.n.01	coonhound.n.01
white_wolf.n.01	wolf.n.01
warhorse.n.03	saddle_horse.n.01
grizzly.n.01	brown_bear.n.01
leopard.n.02	big_cat.n.01
tiglon.n.01	big_cat.n.01
rambouillet.n.01	domestic_sheep.n.01
standard_schnauzer.n.01	schnauzer.n.01
bearded_seal.n.01	earless_seal.n.01
grey_fox.n.01	fox.n.01
uakari.n.01	new_world_monkey.n.01
new_world_tapir.n.01	tapir.n.01
guanaco.n.01	llama.n.01
post_horse.n.01	horse.n.01
wolfhound.n.01	hound.n.01
steed.n.01	warhorse.n.03
banteng.n.01	ox.n.02
jackass_bat.n.01	vespertilian_bat.n.01
maltese_dog.n.01	toy_dog.n.01
urial.n.01	wild_sheep.n.01
irish_water_spaniel.n.01	water_spaniel.n.01
american_foxhound.n.01	foxhound.n.01
tortoiseshell.n.03	domestic_cat.n.01
muishond.n.01	weasel.n.02
striped_muishond.n.01	muishond.n.01
devon.n.02	cattle.n.01
mandrill.n.01	baboon.n.01
burmese_cat.n.01	domestic_cat.n.01
tiger.n.02	big_cat.n.01
australian_terrier.n.01	terrier.n.01
bezoar_goat.n.01	wild_goat.n.01
marsupial.n.01	metatherian.n.01
broadtail.n.02	domestic_sheep.n.01
thylacine.n.01	dasyurid_marsupial.n.01
lakeland_terrier.n.01	wirehair.n.01
oryx.n.01	antelope.n.01
tenrec.n.01	insectivore.n.01
hunting_dog.n.01	dog.n.01
ermine.n.02	weasel.n.02
black_rat.n.01	rat.n.01
mouser.n.01	domestic_cat.n.01
homo.n.02	hominid.n.01
staghound.n.01	hound.n.01
white_rhinoceros.n.01	rhinoceros.n.01
pacer.n.02	horse.n.01
binturong.n.01	civet.n.01
crab-eating_macaque.n.01	macaque.n.01
harbor_porpoise.n.01	porpoise.n.01
mustang.n.01	pony.n.01
mountain_sheep.n.01	wild_sheep.n.01
false_vampire.n.01	leafnose_bat.n.01
eohippus.n.01	horse.n.01
carabao.n.01	water_buffalo.n.01
brewer's_mole.n.01	mole.n.06
black_sheep.n.02	sheep.n.01
nyala.n.02	harnessed_antelope.n.01
white-footed_mouse.n.01	wood_mouse.n.01
golden_retriever.n.01	retriever.n.01
even-toed_ungulate.n.01	ungulate.n.01
mink.n.03	musteline_mammal.n.01
grampus.n.02	dolphin.n.02
indian_buffalo.n.01	water_buffalo.n.01
steller's_sea_cow.n.01	sea_cow.n.01
nail-tailed_wallaby.n.01	wallaby.n.01
ayrshire.n.01	dairy_cattle.n.01
peludo.n.01	armadillo.n.01
brush-tailed_porcupine.n.01	old_world_porcupine.n.01
baronduki.n.01	squirrel.n.01
cocker_spaniel.n.01	spaniel.n.01
ice_bear.n.01	bear.n.01
sinanthropus.n.01	hominid.n.01
clydesdale_terrier.n.01	skye_terrier.n.01
digitigrade_mammal.n.01	placental.n.01
bullock.n.01	cattle.n.01
toy_poodle.n.01	poodle.n.01
italian_greyhound.n.01	greyhound.n.01
pomeranian.n.01	spitz.n.01
silky_anteater.n.01	anteater.n.02
bowhead.n.01	baleen_whale.n.01
packrat.n.02	wood_rat.n.01
setter.n.02	sporting_dog.n.01
red_bat.n.01	vespertilian_bat.n.01
wirehair.n.01	terrier.n.01
fossorial_mammal.n.01	mammal.n.01
typical_jerboa.n.01	jerboa.n.01
nilgai.n.01	antelope.n.01
coydog.n.01	coyote.n.01
peking_man.n.01	homo_erectus.n.01
echidna.n.02	monotreme.n.01
howler_monkey.n.01	new_world_monkey.n.01
river_dolphin.n.01	dolphin.n.02
zebu.n.01	brahman.n.04
jerboa.n.01	rodent.n.01
cattalo.n.01	beef.n.01
slender-tailed_meerkat.n.01	meerkat.n.01
english_springer.n.01	springer_spaniel.n.01
wharf_rat.n.02	brown_rat.n.01
bovine.n.01	bovid.n.01
guenon.n.01	old_world_monkey.n.01
eskimo_dog.n.01	working_dog.n.01
aardvark.n.01	placental.n.01
eastern_chipmunk.n.01	squirrel.n.01
boskop_man.n.01	homo_sapiens.n.01
santa_gertrudis.n.01	beef.n.01
wild_sheep.n.01	bovid.n.01
shetland_sheepdog.n.01	shepherd_dog.n.01
briard.n.01	shepherd_dog.n.01
brown_bear.n.01	bear.n.01
narwhal.n.01	whale.n.02
tarpan.n.01	wild_horse.n.01
jaculus_jaculus.n.01	jerboa.n.01
wild_goat.n.01	goat.n.01
lioness.n.01	lion.n.01
mapinguari.n.01	mylodontid.n.01
brabancon_griffon.n.01	griffon.n.02
titi.n.03	new_world_monkey.n.01
dandie_dinmont.n.01	terrier.n.01
porpoise.n.01	dolphin.n.02
muntjac.n.01	deer.n.01
chevrotain.n.01	ruminant.n.01
sporting_dog.n.01	hunting_dog.n.01
warthog.n.01	swine.n.01
king_charles_spaniel.n.01	toy_spaniel.n.01
apar.n.01	armadillo.n.01
vespertilian_bat.n.01	carnivorous_bat.n.01
boston_bull.n.01	terrier.n.01
weimaraner.n.01	hound.n.01
brocket.n.02	red_deer.n.01
java_man.n.01	homo_erectus.n.01
bonnet_macaque.n.01	macaque.n.01
liver_chestnut.n.01	horse.n.01
gibbon.n.02	lesser_ape.n.01
imperial_mammoth.n.01	mammoth.n.01
little_chief_hare.n.01	pika.n.01
mountain_paca.n.01	rodent.n.01
jerboa_kangaroo.n.01	rat_kangaroo.n.01
kerry_blue_terrier.n.01	terrier.n.01
carnivorous_bat.n.01	bat.n.01
crab-eating_opossum.n.01	opossum.n.02
mediterranean_water_shrew.n.01	water_shrew.n.01
milking_shorthorn.n.01	dairy_cattle.n.01
egyptian_cat.n.01	domestic_cat.n.01
roe_deer.n.01	deer.n.01
grevy's_zebra.n.01	zebra.n.01
giraffe.n.01	ruminant.n.01
civet.n.01	viverrine.n.01
kudu.n.01	antelope.n.01
dwarf_sperm_whale.n.01	toothed_whale.n.01
dasyurid_marsupial.n.01	marsupial.n.01
common_raccoon.n.01	raccoon.n.02
waterbuck.n.01	antelope.n.01
napu.n.01	chevrotain.n.01
soft-coated_wheaten_terrier.n.01	terrier.n.01
mastodon.n.01	proboscidean.n.01
proconsul.n.03	hominoid.n.01
grey_lemming.n.01	lemming.n.01
tiger_cat.n.02	domestic_cat.n.01
silky_tamarin.n.01	tamarin.n.01
masked_shrew.n.01	shrew.n.02
skye_terrier.n.01	terrier.n.01
longwool.n.01	domestic_sheep.n.01
cape_buffalo.n.01	old_world_buffalo.n.01
round-tailed_muskrat.n.01	rodent.n.01
cheviot.n.01	domestic_sheep.n.01
woodland_caribou.n.01	caribou.n.01
pekinese.n.01	toy_dog.n.01
killer_whale.n.01	dolphin.n.02
orange_bat.n.01	leafnose_bat.n.01
hazel_mouse.n.01	dormouse.n.01
attack_dog.n.01	watchdog.n.02
rabbit_ears.n.02	rabbit.n.01
big_brown_bat.n.01	vespertilian_bat.n.01
harnessed_antelope.n.01	antelope.n.01
old_world_porcupine.n.01	porcupine.n.01
papillon.n.01	toy_spaniel.n.01
long-tailed_porcupine.n.01	old_world_porcupine.n.01
smooth-haired_fox_terrier.n.01	fox_terrier.n.01
eastern_dasyure.n.01	dasyure.n.01
grasshopper_mouse.n.01	vole.n.01
fisher.n.02	marten.n.01
columbian_mammoth.n.01	mammoth.n.01
flickertail.n.01	ground_squirrel.n.02
brahman.n.04	bovine.n.01
unguiculata.n.01	placental.n.01
dryopithecine.n.01	hominid.n.01
northern_flying_squirrel.n.01	american_flying_squirrel.n.01
three-year-old_horse.n.01	racehorse.n.01
tabby.n.01	domestic_cat.n.01
belgian_sheepdog.n.01	shepherd_dog.n.01
brown_lemming.n.01	lemming.n.01
lippizan.n.01	saddle_horse.n.01
tamarau.n.01	old_world_buffalo.n.01
rock_wallaby.n.01	wallaby.n.01
echidna.n.01	monotreme.n.01
jackal.n.01	canine.n.02
simian.n.01	primate.n.02
yearling.n.02	placental.n.01
common_eland.n.01	eland.n.01
eastern_chimpanzee.n.01	chimpanzee.n.01
homo_soloensis.n.01	homo.n.02
viverrine.n.01	carnivore.n.01
okapi.n.01	giraffe.n.01
malayan_tapir.n.01	tapir.n.01
rogue_elephant.n.01	elephant.n.01
southern_flying_squirrel.n.01	american_flying_squirrel.n.01
goral.n.01	goat_antelope.n.01
galago.n.01	lemur.n.01
saber-toothed_tiger.n.01	big_cat.n.01
manul.n.01	wildcat.n.03
african_wild_ass.n.01	wild_ass.n.01
kanchil.n.01	chevrotain.n.01
blue_whale.n.01	baleen_whale.n.01
hominoid.n.01	primate.n.02
longtail_weasel.n.01	weasel.n.02
stalking-horse.n.04	horse.n.01
springer_spaniel.n.01	spaniel.n.01
miniature_pinscher.n.01	pinscher.n.01
placental.n.01	mammal.n.01
sea_cow.n.01	aquatic_mammal.n.01
doberman.n.01	pinscher.n.01
tigress.n.01	tiger.n.02
schipperke.n.01	watchdog.n.02
false_saber-toothed_tiger.n.01	saber-toothed_tiger.n.01
red_deer.n.01	deer.n.01
tree_squirrel.n.01	squirrel.n.01
arctic_fox.n.01	fox.n.01
slow_loris.n.01	lemur.n.01
border_collie.n.01	shepherd_dog.n.01
rorqual.n.01	baleen_whale.n.01
leonberg.n.01	dog.n.01
lagomorph.n.01	placental.n.01
ungulata.n.01	placental.n.01
ground_squirrel.n.02	squirrel.n.01
coypu.n.01	rodent.n.01
cayuse.n.01	pony.n.01
gordon_setter.n.01	setter.n.02
malamute.n.01	sled_dog.n.01
exmoor.n.02	pony.n.05
proboscis_monkey.n.01	old_world_monkey.n.01
beaver_rat.n.01	water_rat.n.03
irish_wolfhound.n.01	wolfhound.n.01
trotting_horse.n.01	racehorse.n.01
stone_marten.n.01	marten.n.01
wombat.n.01	marsupial.n.01
pithecanthropus.n.01	hominid.n.01
tailless_tenrec.n.01	tenrec.n.01
mexican_pocket_mouse.n.01	pocket_mouse.n.01
draft_horse.n.01	workhorse.n.02
new_world_beaver.n.01	beaver.n.07
carthorse.n.01	draft_horse.n.01
saki.n.03	new_world_monkey.n.01
coati.n.01	procyonid.n.01
racehorse.n.01	horse.n.01
old_world_beaver.n.01	beaver.n.07
domestic_sheep.n.01	sheep.n.01
guano_bat.n.01	freetail.n.01
jungle_cat.n.01	wildcat.n.03
cougar.n.01	wildcat.n.03
tennessee_walker.n.01	saddle_horse.n.01
flying_fox.n.01	fruit_bat.n.01
fossa.n.03	viverrine.n.01
bushbuck.n.01	harnessed_antelope.n.01
european_wood_mouse.n.01	field_mouse.n.02
virginia_deer.n.01	deer.n.01
pacific_walrus.n.01	walrus.n.01
true_marmoset.n.01	marmoset.n.01
blenheim_spaniel.n.01	english_toy_spaniel.n.01
merino.n.01	domestic_sheep.n.01
indri.n.01	lemur.n.01
giant_armadillo.n.01	armadillo.n.01
equine.n.01	odd-toed_ungulate.n.01
big_cat.n.01	feline.n.01
capybara.n.01	rodent.n.01
suricate.n.01	meerkat.n.01
homo_habilis.n.01	homo.n.02
white-lipped_peccary.n.01	peccary.n.01
przewalski's_horse.n.01	wild_horse.n.01
persian_cat.n.01	domestic_cat.n.01
asiatic_black_bear.n.01	bear.n.01
american_mastodon.n.01	mastodon.n.01
boxer.n.04	working_dog.n.01
mexican_hairless.n.01	dog.n.01
fox_squirrel.n.01	tree_squirrel.n.01
pembroke.n.01	corgi.n.01
mule_deer.n.01	deer.n.01
flat-coated_retriever.n.01	retriever.n.01
galloway.n.02	beef.n.01
kuvasz.n.01	watchdog.n.02
barbary_ape.n.01	macaque.n.01
stallion.n.01	male_horse.n.01
elk.n.01	deer.n.01
mountain_beaver.n.01	rodent.n.01
rhinoceros.n.01	odd-toed_ungulate.n.01
pachyderm.n.01	placental.n.01
cave_myotis.n.01	vespertilian_bat.n.01
ichneumon.n.01	mongoose.n.01
western_lowland_gorilla.n.01	gorilla.n.01
mantled_ground_squirrel.n.01	ground_squirrel.n.02
pinscher.n.01	watchdog.n.02
meadow_vole.n.01	vole.n.01
hairy-legged_vampire_bat.n.01	vampire_bat.n.01
sloth_bear.n.01	bear.n.01
seeing_eye_dog.n.01	guide_dog.n.01
plantigrade_mammal.n.01	placental.n.01
guernsey.n.02	dairy_cattle.n.01
aegyptopithecus.n.01	hominoid.n.01
toy_terrier.n.01	toy_dog.n.01
tamandua.n.01	anteater.n.02
mountain_chinchilla.n.01	rodent.n.01
manx.n.02	domestic_cat.n.01
damaraland_mole_rat.n.01	fossorial_mammal.n.01
miniature_schnauzer.n.01	schnauzer.n.01
canada_lynx.n.01	lynx.n.02
house_mouse.n.01	mouse.n.01
hyrax.n.01	placental.n.01
samoyed.n.03	spitz.n.01
basenji.n.01	dog.n.01
dingo.n.01	wild_dog.n.01
hampshire.n.02	domestic_sheep.n.01
dairy_cattle.n.01	cattle.n.01
scotch_terrier.n.01	terrier.n.01
charolais.n.01	beef.n.01
wether.n.01	sheep.n.01
african_hunting_dog.n.01	wild_dog.n.01
rhesus.n.01	macaque.n.01
