# Supplementary material
Source: ML conference proceedings conference paper supplement (https://openreview.net/forum?id=oEtrDiFOFF)
Supplement: supplementary_material [file features.xlsx]

## Sheet: Sheet1
-0.00149437	-0.0118366	-0.00666318
-0.00151539	-0.0120495	-0.00680133
-0.001469	-0.011562	-0.00647649
-0.00144356	-0.000690069	0.000357577
-0.00130721	-0.00989818	-0.00538498
-0.00117967	-0.00551112	0.0412061
-0.00116712	-0.00815022	-0.00404833
-0.00199635	0.0113041	-0.00163446
-0.00234297	0.0137315	-0.0020145
-0.00140311	-0.0108963	-0.00604553
-0.00142589	-0.0108496	-0.00586861
-0.00211707	0.0122818	-0.0018114
-0.0024159	0.0145169	-0.00219359
-0.00100669	-0.00437271	0.0305852
-0.00122015	-0.00567042	0.0419724
-0.00060024	-0.00144608	0.000939296
-0.000695834	-0.00175003	0.00117298
-0.00209085	0.0120746	-0.00177459
-0.00184426	0.00988202	-0.00133295
0.000779962	-0.00058013	0.000320987
-0.00226331	0.0134214	-0.00201235
-0.00240446	0.0143889	-0.00216634
-0.00206578	0.0115009	-0.00159688
-0.00223508	0.0127078	-0.00179025
-0.0006343	-0.00155148	0.00101847
-0.00191159	0.0103549	-0.00140777
-0.00223823	0.0126708	-0.00177735
-0.00196269	0.0110324	-0.00158579
-0.000778752	-0.00229472	0.00195153
-0.000691906	-0.00176255	0.00119779
-0.00072399	-0.00186699	0.00127957
-0.00207917	0.0119827	-0.00175832
-0.00190027	0.0102721	-0.0013943
-0.00136912	-0.0105186	-0.00578377
-0.00150436	-0.0118529	-0.00663195
-0.000818573	-0.00245031	0.0021081
-0.000908234	-0.0027931	0.00244774
-0.00122355	0.00535015	-0.000595232
-0.00199147	0.0109627	-0.0015097
-0.00226258	0.0128572	-0.00180869
-0.00125681	-0.00937494	-0.0050405
-0.00188713	0.0102078	-0.00138755
-0.00206491	0.0118726	-0.00173907
-0.00118672	-0.0085585	-0.00446122
-0.00114126	-0.00513277	0.0367893
-0.00113219	-0.00507536	0.0362835
-0.00200315	0.0113556	-0.00164332
-0.00143906	-0.0112586	-0.00627963
-0.00164394	-0.0133171	-0.00760737
-0.00199147	0.0109627	-0.0015097
0.0622198	0.00272169	-0.000892306
0.0649095	0.00285792	-0.000939804
-0.00140311	-0.0108963	-0.00604553
-0.00160846	-0.0129543	-0.00737034
-0.00139985	-0.0108612	-0.00602168
-0.00205192	0.0113815	-0.00157535
-0.00136912	-0.0105186	-0.00578377
-0.0015424	-0.0122182	-0.00685957
-0.000872397	-0.0026573	0.00231401
-0.000918696	-0.0028325	0.00248631
-0.00140311	-0.0108963	-0.00604553
-0.000677556	-0.00175122	0.00122466
-0.000766538	-0.00204568	0.00146222
-0.00199147	0.0109627	-0.0015097
-0.000818573	-0.00245031	0.0021081
-0.00140311	-0.0108963	-0.00604553
-0.00217132	0.0126902	-0.00188154
-0.00130721	-0.00989818	-0.00538498
-0.000897492	-0.00560574	-0.00253167
-0.0011502	-0.00533379	0.03967
-0.00135365	-0.010358	-0.00567795
-0.00133179	-0.0101246	-0.00552108
-0.00159347	-0.0127614	-0.00722539
-0.00132679	-0.0101182	-0.00553864
-0.00167586	0.00880865	-0.00119573
-0.000784088	-0.00231667	0.00197441
-0.000516873	-0.00114778	0.000687346
-0.000539548	-0.00121202	0.00073161
-0.00097392	-0.00625671	-0.0028872
-0.00104938	-0.00687669	-0.00321701
-0.00206578	0.0115009	-0.00159688
-0.00226238	0.0128934	-0.00181894
-0.00213936	0.0124365	-0.00183633
-0.000622922	-0.00152458	0.0010033
-0.00109763	-0.0050153	0.0368983
-0.000516873	-0.00114778	0.000687346
-0.00203851	0.0112935	-0.00156211
-0.002213	0.0125203	-0.00175666
-0.00218525	0.012801	-0.00190135
-0.00251463	0.0152887	-0.00233001
-0.000636402	-0.00156923	0.00103853
-0.000709638	-0.00179964	0.00121402
-0.00135365	-0.010358	-0.00567795
-0.000738162	-0.00197232	0.00142288
-0.000759971	-0.0020444	0.0014814
-0.000685619	-0.00179352	0.0012746
-0.00077745	-0.00210312	0.00152962
-0.00217424	0.0122627	-0.00171759
-0.000756573	-0.00219355	0.0018374
-0.000897952	-0.00274486	0.0023946
-0.00104684	-0.00460438	0.0325057
-0.0011295	-0.00507206	0.0363277
-0.000724287	-0.00204135	0.0016666
-0.0023068	0.0137728	-0.00207584
-0.00242626	0.0146856	-0.00223453
-0.00119791	-0.00561998	0.042144
-0.00127025	-0.00604623	0.045781
-0.00209588	0.0116998	-0.00162689
-0.00198331	0.0108986	-0.00149873
-0.000931212	-0.00587394	-0.00267059
-0.000951638	-0.0060383	-0.00275658
-0.00070254	-0.00183549	0.00129359
-0.000756705	-0.00200927	0.00143048
-0.00139985	-0.0108612	-0.00602168
-0.00126504	-0.0094576	-0.00509356
-0.00155368	-0.0123295	-0.00693152
-0.00116712	-0.00815022	-0.00404833
-0.00132383	-0.00953826	-0.00483758
-0.000677293	-0.001747	0.00121929
-0.0011502	-0.00533379	0.03967
-0.00126908	-0.00602909	0.0455684
-0.000747789	-0.00194017	0.00133441
-0.00100669	-0.00437271	0.0305852
-0.00106335	-0.00468735	0.0331217
-0.00158878	-0.0127495	-0.00723489
-0.000559035	-0.00131505	0.000838932
-0.00117161	-0.00844091	-0.00440008
-0.00126105	-0.00926151	-0.00489175
-0.00136482	-0.0104748	-0.00575527
-0.00194412	0.0109245	-0.00157102
-0.00207917	0.0119827	-0.00175832
-0.00211707	0.0122818	-0.0018114
-0.000859184	-0.00264613	0.00234049
-0.0014259	-0.011083	-0.00614447
-0.00107578	-0.00729538	-0.00354183
-0.00064704	-0.00176627	0.00140971
0.0605008	0.00262868	-0.000857998
-0.00126504	-0.0094576	-0.00509356
-0.00231101	0.0138066	-0.00208192
-0.00256622	0.0157462	-0.00241773
-0.000680481	-0.00176152	0.00123334
-0.00128489	-0.00966229	-0.00522764
-0.00204703	0.0113593	-0.00157327
-0.0012133	-0.0085754	-0.00429718
-0.00131427	-0.00947865	-0.00481507
-0.00105566	-0.00465645	0.0329437
-0.00110022	-0.00490775	0.0349928
-0.000913869	-0.00575529	-0.00261745
-0.00106999	-0.00704049	-0.00330198
-0.000978529	-0.00628583	-0.00289931
-0.000524283	-0.00120961	0.000760922
-0.00194977	0.0106498	-0.00145777
-0.00246711	0.0148983	-0.00225868
-0.00140311	-0.0108963	-0.00604553
-0.000662758	-0.00166642	0.00112183
-0.000756923	-0.00197429	0.00136362
-0.00111407	-0.00789769	-0.00406788
0.00134453	-0.0012051	0.000771185
-0.00229394	0.01367	-0.00205742
-0.00255887	0.0156973	-0.00241019
-0.000787549	-0.00231102	0.00195264
-0.000853869	-0.00255368	0.00218458
-0.00211707	0.0122818	-0.0018114
-0.00204703	0.0113593	-0.00157327
-0.00222737	0.0130866	-0.00194647
-0.00144621	-0.0113385	-0.00633521
-0.00194412	0.0109245	-0.00157102
-0.000661408	-0.00164203	0.0010904
-0.000671043	-0.00167059	0.00111118
-0.00159608	-0.0128646	-0.00732921
-0.000632494	-0.00155524	0.00102683
-0.000685323	-0.00172141	0.00115333
-0.000574972	-0.00136672	0.000879001
-0.000628386	-0.00152979	0.00100028
-0.000838128	-0.00255752	0.00224587
-0.000965306	-0.00306808	0.00277359
-0.000982217	-0.00633982	-0.0029382
-0.00112249	-0.0075067	-0.00356526
-0.00085653	-0.00259551	0.00225203
-0.00209085	0.0120746	-0.00177459
-0.00225724	0.0133097	-0.00198459
-0.0021098	0.0122266	-0.00180188
-0.00206578	0.0115009	-0.00159688
-0.00105566	-0.00465645	0.0329437
-0.000784706	-0.00229982	0.00194137
-0.000778752	-0.00229472	0.00195153
-0.00145791	-0.0114439	-0.00639721
-0.00136235	-0.0104247	-0.0057111
-0.00139435	-0.0107354	-0.00590621
-0.00208591	0.0120363	-0.00176787
0.0580911	0.00248254	-0.000799478
0.0649095	0.00285792	-0.000939804
-0.00220488	0.0129408	-0.00192436
-0.00217132	0.0126902	-0.00188154
-0.00198009	0.0108772	-0.0014955
-0.000574972	-0.00136672	0.000879001
0.0599136	0.00259421	-0.000844525
-0.00205192	0.0113815	-0.00157535
-0.00207125	0.0115159	-0.0015965
-0.00229394	0.01367	-0.00205742
-0.00117702	-0.00849317	-0.00443251
-0.002176	0.0127268	-0.001888
-0.000675426	-0.00186511	0.00150049
-0.00217132	0.0126902	-0.00188154
-0.00140311	-0.0108963	-0.00604553
-0.00204703	0.0113593	-0.00157327
-0.000602233	-0.00160804	0.00126296
-0.00199658	0.0109814	-0.00151065
-0.000982217	-0.00633982	-0.0029382
-0.00116947	-0.00817396	-0.00406314
-0.000524283	-0.00120961	0.000760922
-0.00232621	0.013916	-0.00210008
-0.00113482	-0.00810073	-0.00419513
-0.0011502	-0.00533379	0.03967
-0.00126677	-0.00602971	0.0456652
-0.00100023	-0.00650142	-0.00302978
-0.00107578	-0.00729538	-0.00354183
-0.00123573	-0.00870127	-0.00433623
-0.00220488	0.0129408	-0.00192436
-0.00173719	0.00912888	-0.00121366
-0.000844177	-0.00254762	0.0022041
-0.00119791	-0.00561998	0.042144
-0.00147206	-0.0115943	-0.00649799
-0.00231101	0.0138066	-0.00208192
-0.00231101	0.0138066	-0.00208192
-0.000383888	-0.000763077	0.000418299
-0.000680481	-0.00176152	0.00123334
-0.00163989	0.00856888	-0.00115843
-0.0014353	-0.0112193	-0.00625359
-0.00198331	0.0108986	-0.00149873
-0.00199147	0.0109627	-0.0015097
-0.000982217	-0.00633982	-0.0029382
-0.00149437	-0.0118366	-0.00666318
-0.00145104	-0.0113893	-0.00636903
-0.00163233	-0.0132212	-0.00755559
-0.00215706	0.0125767	-0.00186126
-0.000784088	-0.00231667	0.00197441
-0.00198331	0.0108986	-0.00149873
-0.00148691	-0.0117465	-0.00659791
-0.00070254	-0.00183549	0.00129359
-0.000672254	-0.00170749	0.00116555
-0.000717055	-0.00185189	0.00127855
-0.00104118	-0.00684956	-0.00321981
-0.0017283	0.00918223	-0.00125663
-0.0018234	0.00982109	-0.00135661
-0.000842	-0.00254087	0.0021985
-0.000677556	-0.00175122	0.00122466
-0.000741255	-0.00196245	0.00139534
-0.00194412	0.0109245	-0.00157102
-0.00136912	-0.0105186	-0.00578377
-0.00199635	0.0113041	-0.00163446
-0.00140705	-0.0109421	-0.00607816
-0.001469	-0.011562	-0.00647649
-0.00190027	0.0102721	-0.0013943
-0.00245904	0.0149387	-0.00227887
-0.000784088	-0.00231667	0.00197441
-0.00136912	-0.0105186	-0.00578377
-0.00116947	-0.00817396	-0.00406314
-0.00194412	0.0109245	-0.00157102
-0.0022038	0.0128052	-0.00188456
-0.00136912	-0.0105186	-0.00578377
-0.00209865	0.012137	-0.00178575
-0.000622897	-0.00152179	0.000999417
-0.00140311	-0.0108963	-0.00604553
-0.000927262	-0.0029185	0.00262132
-0.00121175	-0.00894177	-0.00477055
-0.00198331	0.0108986	-0.00149873
-0.00237189	0.0141953	-0.00213957
-0.000889705	-0.00276906	0.00246782
-0.00111692	-0.00512081	0.0377437
-0.00126908	-0.00602909	0.0455684
-0.00217132	0.0126902	-0.00188154
-0.000586212	-0.00144389	0.000977841
-0.000761922	-0.00204592	0.00147956
-0.00143881	-0.0112546	-0.00627633
-0.000929055	-0.00589533	-0.00269859
-0.000524283	-0.00120961	0.000760922
-0.00180832	0.00961772	-0.00128978
-0.00187032	0.010039	-0.00135485
-0.000756573	-0.00219355	0.0018374
-0.000632494	-0.00155524	0.00102683
-0.00126504	-0.0094576	-0.00509356
-0.000897492	-0.00560574	-0.00253167
-0.000698654	-0.0019731	0.00162056
-0.00139985	-0.0108612	-0.00602168
-0.00206578	0.0115009	-0.00159688
-0.000681705	-0.00177942	0.00126243
-0.000559035	-0.00131505	0.000838932
-0.00057329	-0.00135778	0.000870279
-0.00136482	-0.0104748	-0.00575527
-0.000632539	-0.00159955	0.00110075
-0.00130721	-0.00989818	-0.00538498
-0.00139985	-0.0108612	-0.00602168
0.0568951	0.00242523	-0.000780627
-0.000982217	-0.00633982	-0.0029382
-0.00126504	-0.0094576	-0.00509356
-0.000818573	-0.00245031	0.0021081
-0.00117702	-0.00849317	-0.00443251
-0.00167403	0.00881217	-0.0011981
-0.00188713	0.0102078	-0.00138755
-0.000778752	-0.00229472	0.00195153
-0.00111982	-0.00768603	-0.00376397
-0.00218525	0.012801	-0.00190135
-0.00097392	-0.00625671	-0.0028872
-0.000677556	-0.00175122	0.00122466
-0.00142661	-0.0110402	-0.00609385
-0.00116947	-0.00817396	-0.00406314
-0.00133713	-0.00968186	-0.00493092
-0.000927262	-0.0029185	0.00262132
-0.00231101	0.0138066	-0.00208192
-0.00205192	0.0113815	-0.00157535
-0.002176	0.0127268	-0.001888
-0.00223723	0.0131847	-0.00196629
-0.00188713	0.0102078	-0.00138755
-0.00143906	-0.0112586	-0.00627963
-0.00198331	0.0108986	-0.00149873
-0.00144621	-0.0113385	-0.00633521
-0.00112288	-0.00798346	-0.00412143
-0.00120943	-0.00877346	-0.00459289
-0.00198331	0.0108986	-0.00149873
-0.00145104	-0.0113893	-0.00636903
-0.00198331	0.0108986	-0.00149873
-0.00104118	-0.00684956	-0.00321981
-0.00111057	-0.00742881	-0.00353195
-0.00198331	0.0108986	-0.00149873
-0.00227901	0.0129859	-0.00183067
-0.000707054	-0.00186562	0.00133387
-0.00116712	-0.00815022	-0.00404833
-0.000781098	-0.00228567	0.00192716
-0.00195988	0.0107262	-0.00147052
-0.00136912	-0.0105186	-0.00578377
-0.00117967	-0.00551112	0.0412061
-0.00194412	0.0109245	-0.00157102
-0.00121175	-0.00894177	-0.00477055
-0.0012133	-0.0085754	-0.00429718
-0.00206578	0.0115009	-0.00159688
-0.00113726	-0.00783672	-0.0038481
-0.00107578	-0.00729538	-0.00354183
-0.00130721	-0.00989818	-0.00538498
-0.00097392	-0.00625671	-0.0028872
-0.0021098	0.0122266	-0.00180188
-0.00220488	0.0129408	-0.00192436
-0.00201004	0.0110705	-0.00152413
-0.000856436	-0.00259651	0.00225395
-0.00100669	-0.00437271	0.0305852
-0.000818573	-0.00245031	0.0021081
-0.000691906	-0.00176255	0.00119779
-0.00140311	-0.0108963	-0.00604553
-0.000963449	-0.00306285	0.00276985
-0.00193783	0.0105626	-0.00144359
-0.00217132	0.0126902	-0.00188154
-0.00193284	0.010497	-0.00142947
-0.00103265	-0.00677444	-0.0031778
-0.000622897	-0.00152179	0.000999417
-0.00206578	0.0115009	-0.00159688
-0.000677556	-0.00175122	0.00122466
0.0531486	0.00220497	-0.00069445
-0.00128489	-0.00966229	-0.00522764
-0.00116712	-0.00815022	-0.00404833
-0.00220488	0.0129408	-0.00192436
-0.00085653	-0.00259551	0.00225203
-0.00058731	-0.00140901	0.000913183
-0.000982217	-0.00633982	-0.0029382
-0.00103274	-0.00675634	-0.00316054
-0.00134234	-0.0102422	-0.00560245
-0.000642152	-0.00174822	0.00139244
-0.000658525	-0.00180502	0.00144447
-0.00215706	0.0125767	-0.00186126
-0.00139985	-0.0108612	-0.00602168
-0.00144621	-0.0113385	-0.00633521
-0.00126504	-0.0094576	-0.00509356
-0.000753896	-0.0020053	0.00143053
-0.00139985	-0.0108612	-0.00602168
0.0554426	0.00233661	-0.000744995
0.0610795	0.00264322	-0.000858438
0.057155	0.00242768	-0.000778087
0.0592443	0.00253927	-0.000818819
-0.00149437	-0.0118366	-0.00666318
-0.000563291	-0.00132863	0.000849336
-0.00143906	-0.0112586	-0.00627963
-0.000691906	-0.00176255	0.00119779
-0.00198331	0.0108986	-0.00149873
-0.00198331	0.0108986	-0.00149873
-0.00133179	-0.0101246	-0.00552108
-0.000889705	-0.00276906	0.00246782
-0.00128099	-0.00960528	-0.00518308
-0.000588003	-0.00140298	0.000904032
-0.00121175	-0.00894177	-0.00477055
-0.0017116	0.00905106	-0.00123392
-0.00136482	-0.0104748	-0.00575527
-0.00143881	-0.0112546	-0.00627633
-0.00203716	0.0112876	-0.00156165
-0.00136235	-0.0104247	-0.0057111
0.00134453	-0.0012051	0.000771185
0.00136178	-0.00122373	0.000784349
-0.00206578	0.0115009	-0.00159688
-0.00201004	0.0110705	-0.00152413
-0.0014613	-0.011481	-0.00642255
-0.00193783	0.0105626	-0.00144359
-0.00140705	-0.0109421	-0.00607816
-0.000383888	-0.000763077	0.000418299
-0.000661173	-0.00181921	0.00146091
-0.000635377	-0.00159119	0.0010832
-0.00112288	-0.00798346	-0.00412143
-0.000525707	-0.00117464	0.000706799
-0.000570091	-0.00130142	0.000794725
-0.000588003	-0.00140298	0.000904032
-0.00194443	0.0106107	-0.00145141
-0.000672254	-0.00170749	0.00116555
-0.00221429	0.0130471	-0.00194734
-0.00108104	-0.00490832	0.0359256
-0.00206578	0.0115009	-0.00159688
-0.00217132	0.0126902	-0.00188154
-0.00189762	0.0105694	-0.00150963
-0.00117967	-0.00551112	0.0412061
-0.0019518	0.0106653	-0.00146039
-0.00234521	0.0140007	-0.00210692
-0.00158952	0.00802057	-0.00102977
-0.000680481	-0.00176152	0.00123334
-0.000787549	-0.00231102	0.00195264
-0.00188713	0.0102078	-0.00138755
-0.000543245	-0.0012396	0.000761739
-0.000595519	-0.00139373	0.000871729
-0.00111763	-0.0079318	-0.00408897
-0.00228917	0.0136322	-0.00205065
-0.000814554	-0.00241223	0.00205115
-0.000616589	-0.00150267	0.000985428
-0.000688602	-0.00173038	0.00115942
-0.00217757	0.0127225	-0.00188526
-0.00188713	0.0102078	-0.00138755
-0.000598708	-0.00140637	0.0008825
-0.000619014	-0.00146291	0.000921087
-0.00145791	-0.0114439	-0.00639721
-0.00116947	-0.00817396	-0.00406314
-0.00139985	-0.0108612	-0.00602168
-0.00130206	-0.00936009	-0.00474303
-0.00115822	-0.00802267	-0.00395386
0.0549117	0.00230538	-0.000732784
-0.00194412	0.0109245	-0.00157102
-0.000914028	-0.00383473	0.0261088
-0.000547471	-0.00125318	0.000772048
-0.00221777	0.0130292	-0.00193845
-0.001462	-0.0115065	-0.00644791
-0.00141079	-0.010917	-0.00603112
-0.00111982	-0.00768603	-0.00376397
-0.000982217	-0.00633982	-0.0029382
-0.00217132	0.0126902	-0.00188154
-0.0023068	0.0137728	-0.00207584
-0.00188713	0.0102078	-0.00138755
-0.0011502	-0.00533379	0.03967
-0.00206491	0.0118726	-0.00173907
-0.000549771	-0.00132811	0.000886914
-0.00119847	-0.00843345	-0.00421182
-0.0014353	-0.0112193	-0.00625359
-0.000661173	-0.00181921	0.00146091
-0.00130721	-0.00989818	-0.00538498
-0.00217242	0.0126822	-0.00187812
-0.000455379	-0.000955646	0.000545296
-0.00143572	-0.0112223	-0.00625485
-0.00211707	0.0122818	-0.0018114
-0.000609509	-0.00148999	0.000981988
-0.00224425	0.0132888	-0.00199095
-0.00115145	-0.00532311	0.0394617
-0.000889705	-0.00276906	0.00246782
-0.0006378	-0.00157391	0.00104226
-0.00207917	0.0119827	-0.00175832
-0.00100669	-0.00437271	0.0305852
-0.00116947	-0.00817396	-0.00406314
-0.000817186	-0.00244439	0.00210176
-0.000700289	-0.00179343	0.00123026
-0.000982217	-0.00633982	-0.0029382
-0.00134234	-0.0102422	-0.00560245
-0.00146541	-0.0115292	-0.00645722
-0.00117967	-0.00551112	0.0412061
-0.00119847	-0.00843345	-0.00421182
-0.00119847	-0.00843345	-0.00421182
-0.000965306	-0.00306808	0.00277359
-0.00140311	-0.0108963	-0.00604553
0.0605008	0.00262868	-0.000857998
-0.00206578	0.0115009	-0.00159688
-0.000756573	-0.00219355	0.0018374
-0.0011502	-0.00533379	0.03967
-0.000604231	-0.001459	0.0009493
-0.000602233	-0.00160804	0.00126296
-0.00224425	0.0132888	-0.00199095
-0.00111407	-0.00789769	-0.00406788
-0.00117138	-0.00841655	-0.00437572
-0.000818573	-0.00245031	0.0021081
-0.00202233	0.0111611	-0.00153897
-0.00151539	-0.0120495	-0.00680133
-0.000818573	-0.00245031	0.0021081
-0.00113482	-0.00810073	-0.00419513
0.00158871	-0.0015812	0.0011309
0.00166973	-0.00168396	0.00121541
-0.00215242	0.0125405	-0.00185489
-0.00218569	0.0127882	-0.00189711
-0.000854154	-0.0025596	0.00219381
0.0531486	0.00220497	-0.00069445
-0.00139985	-0.0108612	-0.00602168
-0.00200138	0.0109796	-0.00150597
-0.000816191	-0.00244072	0.00209825
-0.00121175	-0.00894177	-0.00477055
-0.00226331	0.0134214	-0.00201235
-0.000594601	-0.00146303	0.000983925
-0.000583809	-0.00133893	0.000819847
-0.00194412	0.0109245	-0.00157102
-0.00199658	0.0109814	-0.00151065
-0.00145791	-0.0114439	-0.00639721
-0.00199147	0.0109627	-0.0015097
-0.00108104	-0.00490832	0.0359256
-0.0011842	-0.00551199	0.0410474
-0.00139985	-0.0108612	-0.00602168
-0.00173719	0.00912888	-0.00121366
-0.00206578	0.0115009	-0.00159688
-0.000610129	-0.00143894	0.000905179
-0.000945107	-0.00599632	-0.00273891
-0.00104118	-0.00684956	-0.00321981
-0.000576517	-0.0013405	0.000835245
-0.00218657	0.0127743	-0.00189222
-0.000691906	-0.00176255	0.00119779
-0.00194412	0.0109245	-0.00157102
-0.00116947	-0.00817396	-0.00406314
-0.00134234	-0.0102422	-0.00560245
-0.00103265	-0.00677444	-0.0031778
-0.00134691	-0.0102888	-0.00563282
-0.00198331	0.0108986	-0.00149873
-0.00140311	-0.0108963	-0.00604553
0.0599136	0.00259421	-0.000844525
0.0661012	0.00293826	-0.00097404
-0.0015203	-0.0120847	-0.00681741
-0.00224425	0.0132888	-0.00199095
-0.00139985	-0.0108612	-0.00602168
-0.0006378	-0.00157391	0.00104226
-0.000687218	-0.00172987	0.00116132
-0.00116712	-0.00815022	-0.00404833
-0.00188713	0.0102078	-0.00138755
-0.000698654	-0.0019731	0.00162056
-0.00072399	-0.00186699	0.00127957
-0.00189762	0.0105694	-0.00150963
-0.00139985	-0.0108612	-0.00602168
-0.00198009	0.0108772	-0.0014955
-0.00198331	0.0108986	-0.00149873
-0.00115822	-0.00802267	-0.00395386
-0.00112712	-0.00518959	0.0383883
-0.00116947	-0.00817396	-0.00406314
0.0580911	0.00248254	-0.000799478
-0.00103274	-0.00675634	-0.00316054
-0.00173719	0.00912888	-0.00121366
-0.000809505	-0.00241395	0.00207087
-0.00218525	0.012801	-0.00190135
-0.00218525	0.012801	-0.00190135
-0.00235168	0.0140882	-0.00212717
-0.000817186	-0.00244439	0.00210176
-0.000885172	-0.00270177	0.00235494
-0.00218525	0.012801	-0.00190135
-0.000957525	-0.00611473	-0.00280887
-0.00200406	0.0114218	-0.00166255
0.0568951	0.00242523	-0.000780627
-0.0023068	0.0137728	-0.00207584
-0.00147839	-0.0115976	-0.00647015
-0.00147206	-0.0115943	-0.00649799
-0.00188713	0.0102078	-0.00138755
-0.00121175	-0.00894177	-0.00477055
-0.00230445	0.0136729	-0.00204794
-0.00211707	0.0122818	-0.0018114
-0.000680481	-0.00176152	0.00123334
-0.00136244	-0.0104699	-0.00576231
-0.00144318	-0.0113022	-0.00630882
-0.00200406	0.0114218	-0.00166255
-0.00148274	-0.0116973	-0.00656249
-0.00116712	-0.00815022	-0.00404833
-0.0013237	-0.010018	-0.00544134
-0.00107688	-0.00714956	-0.00338225
-0.00194412	0.0109245	-0.00157102
-0.00184426	0.00988202	-0.00133295
-0.00221429	0.0130471	-0.00194734
-0.00203851	0.0112935	-0.00156211
-0.00140311	-0.0108963	-0.00604553
-0.00164816	0.00862713	-0.00116785
-0.0017116	0.00905106	-0.00123392
-0.000698654	-0.0019731	0.00162056
-0.00218525	0.012801	-0.00190135
-0.000889705	-0.00276906	0.00246782
-0.00204703	0.0113593	-0.00157327
-0.00158952	0.00802057	-0.00102977
-0.00136482	-0.0104748	-0.00575527
-0.00199635	0.0113041	-0.00163446
-0.00156513	0.00806519	-0.00107948
-0.000854259	-0.00262036	0.0023094
-0.00188713	0.0102078	-0.00138755
-0.00125681	-0.00937494	-0.0050405
-0.000934155	-0.00590312	-0.00268819
-0.000934155	-0.00590312	-0.00268819
-0.000632494	-0.00155524	0.00102683
-0.0023068	0.0137728	-0.00207584
-0.00116712	-0.00815022	-0.00404833
-0.00140311	-0.0108963	-0.00604553
-0.000684242	-0.00173639	0.00117664
-0.00149437	-0.0118366	-0.00666318
-0.00198331	0.0108986	-0.00149873
-0.000645813	-0.0016207	0.00109676
-0.00194977	0.0106498	-0.00145777
-0.00203716	0.0112876	-0.00156165
-0.000987933	-0.00638988	-0.00296606
-0.00198331	0.0108986	-0.00149873
-0.000645813	-0.0016207	0.00109676
-0.00224425	0.0132888	-0.00199095
-0.00194977	0.0106498	-0.00145777
-0.000680481	-0.00176152	0.00123334
-0.000929055	-0.00589533	-0.00269859
-0.000662755	-0.00169945	0.00118125
-0.000685619	-0.00179352	0.0012746
-0.000691906	-0.00176255	0.00119779
-0.000598474	-0.00144778	0.000944881
-0.00204703	0.0113593	-0.00157327
-0.00134691	-0.0102888	-0.00563282
-0.000516873	-0.00114778	0.000687346
-0.00105566	-0.00465645	0.0329437
-0.000632494	-0.00155524	0.00102683
-0.00121175	-0.00894177	-0.00477055
-0.00116712	-0.00815022	-0.00404833
-0.00143572	-0.0112223	-0.00625485
-0.000685619	-0.00179352	0.0012746
-0.000743058	-0.00198572	0.00143204
-0.00108104	-0.00490832	0.0359256
-0.000680481	-0.00176152	0.00123334
-0.000957525	-0.00611473	-0.00280887
-0.00111982	-0.00768603	-0.00376397
-0.00119968	-0.00870184	-0.0045579
-0.00231101	0.0138066	-0.00208192
-0.000842	-0.00254087	0.0021985
-0.00211707	0.0122818	-0.0018114
-0.00145104	-0.0113893	-0.00636903
-0.00197777	0.0108431	-0.00148802
-0.00111578	-0.0076488	-0.00374224
-0.00144229	-0.0112448	-0.00624741
0.0537059	0.00223616	-0.000706207
0.0550752	0.00230882	-0.000732595
-0.00145104	-0.0113893	-0.00636903
-0.00122355	0.00535015	-0.000595232
-0.00112712	-0.00518959	0.0383883
-0.00209865	0.012137	-0.00178575
-0.00188713	0.0102078	-0.00138755
-0.00071369	-0.00188956	0.00135455
-0.000661173	-0.00181921	0.00146091
-0.00059846	-0.00143922	0.000933344
-0.00140281	-0.0108543	-0.00599867
-0.00224425	0.0132888	-0.00199095
-0.00111982	-0.00768603	-0.00376397
-0.00137	-0.0105142	-0.00577491
-0.00126504	-0.0094576	-0.00509356
-0.001462	-0.0115065	-0.00644791
-0.00231101	0.0138066	-0.00208192
-0.00205672	0.0113588	-0.00156495
-0.00117161	-0.00844091	-0.00440008
-0.000809505	-0.00241395	0.00207087
-0.000553234	-0.00129671	0.000824965
-0.00194443	0.0106107	-0.00145141
-0.000574972	-0.00136672	0.000879001
-0.0013237	-0.010018	-0.00544134
-0.00140311	-0.0108963	-0.00604553
-0.00198009	0.0108772	-0.0014955
-0.0014431	-0.0113059	-0.00631352
-0.00167403	0.00881217	-0.0011981
-0.000666747	-0.00168876	0.00115034
-0.00116712	-0.00815022	-0.00404833
-0.00125681	-0.00937494	-0.0050405
-0.000416589	-0.000848573	0.000473429
-0.000525707	-0.00117464	0.000706799
-0.00194412	0.0109245	-0.00157102
-0.000666747	-0.00168876	0.00115034
-0.00164816	0.00862713	-0.00116785
-0.0014793	-0.0116596	-0.00653659
-0.0006378	-0.00157391	0.00104226
-0.00104684	-0.00460438	0.0325057
-0.000987933	-0.00638988	-0.00296606
-0.0014613	-0.011481	-0.00642255
-0.00209865	0.012137	-0.00178575
-0.00218525	0.012801	-0.00190135
-0.00231101	0.0138066	-0.00208192
-0.00136912	-0.0105186	-0.00578377
-0.000662755	-0.00169945	0.00118125
-0.00136912	-0.0105186	-0.00578377
-0.00219353	0.0123956	-0.00173835
-0.00199147	0.0109627	-0.0015097
-0.00128489	-0.00966229	-0.00522764
-0.00059846	-0.00143922	0.000933344
-0.00211707	0.0122818	-0.0018114
-0.00198331	0.0108986	-0.00149873
-0.00111982	-0.00768603	-0.00376397
-0.0014042	-0.0108683	-0.00600774
-0.000889705	-0.00276906	0.00246782
-0.001462	-0.0115065	-0.00644791
-0.00135365	-0.010358	-0.00567795
-0.00128489	-0.00966229	-0.00522764
-0.00116947	-0.00817396	-0.00406314
-0.00162438	0.008245	-0.00106292
-0.00148978	-0.0117715	-0.00661195
-0.000592389	-0.00142697	0.000928053
-0.00180832	0.00961772	-0.00128978
-0.000778752	-0.00229472	0.00195153
-0.00204703	0.0113593	-0.00157327
-0.00216564	0.0126459	-0.00187374
-0.00136912	-0.0105186	-0.00578377
-0.00216564	0.0126459	-0.00187374
-0.00140311	-0.0108963	-0.00604553
-0.000929055	-0.00589533	-0.00269859
-0.00168634	0.00865164	-0.00112385
-0.000555047	-0.00131534	0.000850484
-0.000685619	-0.00179352	0.0012746
-0.00139985	-0.0108612	-0.00602168
-0.00143572	-0.0112223	-0.00625485
-0.00100023	-0.00650142	-0.00302978
-0.00121175	-0.00894177	-0.00477055
-0.000888755	-0.00552866	-0.0024886
-0.00140705	-0.0109421	-0.00607816
-0.00127597	-0.00914189	-0.00462443
-0.000524283	-0.00120961	0.000760922
-0.000576517	-0.0013405	0.000835245
-0.00213936	0.0124365	-0.00183633
-0.00194977	0.0106498	-0.00145777
-0.000416589	-0.000848573	0.000473429
-0.00101336	-0.00654261	-0.00302371
-0.00132679	-0.0101182	-0.00553864
-0.00203851	0.0112935	-0.00156211
-0.00214442	0.0124761	-0.0018433
-0.000978529	-0.00628583	-0.00289931
-0.00156513	0.00806519	-0.00107948
-0.00143572	-0.0112223	-0.00625485
-0.00188713	0.0102078	-0.00138755
-0.000494657	-0.00109462	0.000657401
0.0647574	0.00286512	-0.000946944
-0.00139985	-0.0108612	-0.00602168
-0.00144216	-0.0112911	-0.0063012
-0.000559035	-0.00131505	0.000838932
-0.00057329	-0.00135778	0.000870279
-0.00134234	-0.0102422	-0.00560245
-0.00188713	0.0102078	-0.00138755
-0.00194412	0.0109245	-0.00157102
-0.000780547	-0.00305325	0.0195647
0.0503673	0.00205686	-0.000640539
-0.000778752	-0.00229472	0.00195153
-0.000818573	-0.00245031	0.0021081
-0.00188713	0.0102078	-0.00138755
-0.000681705	-0.00177942	0.00126243
-0.000889705	-0.00276906	0.00246782
-0.00134234	-0.0102422	-0.00560245
-0.00143572	-0.0112223	-0.00625485
-0.00144216	-0.0112911	-0.0063012
-0.000967008	-0.00620808	-0.00286543
-0.000967008	-0.00620808	-0.00286543
-0.00224425	0.0132888	-0.00199095
-0.0006378	-0.00157391	0.00104226
-0.00111763	-0.0079318	-0.00408897
-0.000507645	-0.0011202	0.000667624
-0.00160385	0.00811829	-0.00104479
-0.00144216	-0.0112911	-0.0063012
-0.000516873	-0.00114778	0.000687346
-0.00128489	-0.00966229	-0.00522764
-0.000987933	-0.00638988	-0.00296606
-0.00105744	-0.00696462	-0.00327354
-0.00211707	0.0122818	-0.0018114
-0.000680481	-0.00176152	0.00123334
-0.00107578	-0.00729538	-0.00354183
-0.000778752	-0.00229472	0.00195153
-0.00116712	-0.00815022	-0.00404833
-0.00116712	-0.00815022	-0.00404833
-0.00111982	-0.00768603	-0.00376397
-0.00069952	-0.00182476	0.00128449
-0.00180832	0.00961772	-0.00128978
-0.00111763	-0.0079318	-0.00408897
-0.00064704	-0.00176627	0.00140971
-0.00188713	0.0102078	-0.00138755
-0.000563291	-0.00132863	0.000849336
-0.00130721	-0.00989818	-0.00538498
-0.000745982	-0.00215081	0.00179358
-0.000524283	-0.00120961	0.000760922
0.0554426	0.00233661	-0.000744995
-0.000987933	-0.00638988	-0.00296606
-0.001469	-0.011562	-0.00647649
-0.00231101	0.0138066	-0.00208192
-0.00097392	-0.00625671	-0.0028872
0.0599136	0.00259421	-0.000844525
-0.000507645	-0.0011202	0.000667624
-0.0014042	-0.0108683	-0.00600774
-0.000745982	-0.00215081	0.00179358
-0.000780547	-0.00305325	0.0195647
-0.000680481	-0.00176152	0.00123334
-0.0012133	-0.0085754	-0.00429718
-0.00214442	0.0124761	-0.0018433
-0.00111578	-0.0076488	-0.00374224
-0.000383888	-0.000763077	0.000418299
-0.000685619	-0.00179352	0.0012746
-0.00139985	-0.0108612	-0.00602168
-0.00116712	-0.00815022	-0.00404833
-0.000553234	-0.00129671	0.000824965
-0.0011502	-0.00533379	0.03967
-0.00204703	0.0113593	-0.00157327
-0.00211707	0.0122818	-0.0018114
-0.00218525	0.012801	-0.00190135
-0.00210031	0.0121326	-0.00178294
-0.00160385	0.00811829	-0.00104479
-0.00207074	0.0118477	-0.00172565
-0.000973436	-0.00626351	-0.00289595
-0.000994789	-0.00643877	-0.0029892
-0.00188208	0.0104535	-0.00148993
-0.00143906	-0.0112586	-0.00627963
-0.000691906	-0.00176255	0.00119779
-0.00163989	0.00856888	-0.00115843
-0.000636402	-0.00156923	0.00103853
-0.00121175	-0.00894177	-0.00477055
-0.00121175	-0.00894177	-0.00477055
-0.00116947	-0.00817396	-0.00406314
-0.00116947	-0.00817396	-0.00406314
-0.00198331	0.0108986	-0.00149873
-0.00130721	-0.00989818	-0.00538498
-0.000961969	-0.00412087	0.0285351
-0.0023068	0.0137728	-0.00207584
-0.000778752	-0.00229472	0.00195153
-0.000559035	-0.00131505	0.000838932
-0.00057329	-0.00135778	0.000870279
-0.000681705	-0.00177942	0.00126243
-0.00136244	-0.0104699	-0.00576231
-0.000681176	-0.00171037	0.00114619
-0.000569196	-0.00131702	0.000817446
-0.00139985	-0.0108612	-0.00602168
-0.00125103	-0.00931727	-0.00500362
0.057155	0.00242768	-0.000778087
-0.00125103	-0.00931727	-0.00500362
-0.000799809	-0.00235632	0.00199628
-0.00113482	-0.00810073	-0.00419513
-0.000632494	-0.00155524	0.00102683
-0.000638625	-0.00158304	0.0010538
-0.000695305	-0.00178228	0.00122435
-0.000945107	-0.00599632	-0.00273891
-0.000929055	-0.00589533	-0.00269859
-0.00200865	0.0113974	-0.00165052
-0.00167403	0.00881217	-0.0011981
-0.000634408	-0.00156903	0.0010427
-0.000889705	-0.00276906	0.00246782
-0.000745982	-0.00215081	0.00179358
-0.000563291	-0.00132863	0.000849336
-0.00218525	0.012801	-0.00190135
-0.000727195	-0.00207777	0.00172075
-0.00111692	-0.00512081	0.0377437
-0.000661173	-0.00181921	0.00146091
-0.00195545	0.0106618	-0.00145622
-0.00199147	0.0109627	-0.0015097
-0.000897492	-0.00560574	-0.00253167
-0.00116947	-0.00817396	-0.00406314
-0.000818573	-0.00245031	0.0021081
-0.00228917	0.0136322	-0.00205065
-0.00217132	0.0126902	-0.00188154
-0.000973436	-0.00626351	-0.00289595
-0.00111578	-0.0076488	-0.00374224
-0.00164816	0.00862713	-0.00116785
-0.00098316	-0.00628598	-0.00288394
-0.000967008	-0.00620808	-0.00286543
-0.00109763	-0.0050153	0.0368983
-0.000632539	-0.00159955	0.00110075
-0.000934077	-0.00394203	0.0269495
-0.000553234	-0.00129671	0.000824965
-0.00140311	-0.0108963	-0.00604553
-0.00188713	0.0102078	-0.00138755
-0.0021098	0.0122266	-0.00180188
-0.000787549	-0.00231102	0.00195264
-0.000632494	-0.00155524	0.00102683
-0.00194977	0.0106498	-0.00145777
-0.00134234	-0.0102422	-0.00560245
-0.000680481	-0.00176152	0.00123334
-0.00208591	0.0120363	-0.00176787
-0.000680481	-0.00176152	0.00123334
-0.00119847	-0.00843345	-0.00421182
-0.00105378	-0.00734398	-0.00373615
0.0549117	0.00230538	-0.000732784
-0.000609509	-0.00148999	0.000981988
-0.00113482	-0.00810073	-0.00419513
-0.000525707	-0.00117464	0.000706799
-0.000622897	-0.00152179	0.000999417
-0.00116947	-0.00817396	-0.00406314
-0.000636402	-0.00156923	0.00103853
-0.00105566	-0.00465645	0.0329437
-0.000507645	-0.0011202	0.000667624
-0.000507645	-0.0011202	0.000667624
-0.00188713	0.0102078	-0.00138755
-0.000616589	-0.00150267	0.000985428
-0.000967008	-0.00620808	-0.00286543
-0.00113726	-0.00783672	-0.0038481
-0.000632494	-0.00155524	0.00102683
-0.00126504	-0.0094576	-0.00509356
-0.000677556	-0.00175122	0.00122466
-0.00143881	-0.0112546	-0.00627633
-0.000634408	-0.00156903	0.0010427
-0.000563291	-0.00132863	0.000849336
-0.000897492	-0.00560574	-0.00253167
-0.000684242	-0.00173639	0.00117664
-0.000982217	-0.00633982	-0.0029382
0.0549117	0.00230538	-0.000732784
0.0537059	0.00223616	-0.000706207
-0.00188713	0.0102078	-0.00138755
-0.00071369	-0.00188956	0.00135455
-0.0006378	-0.00157391	0.00104226
-0.000521972	-0.00117343	0.000712732
-0.000581682	-0.00135387	0.000843768
0.0605008	0.00262868	-0.000857998
-0.001462	-0.0115065	-0.00644791
-0.000662755	-0.00169945	0.00118125
-0.00112288	-0.00798346	-0.00412143
-0.00071369	-0.00188956	0.00135455
-0.000707054	-0.00186562	0.00133387
-0.000720662	-0.00191146	0.0013716
-0.0021582	0.012589	-0.0018639
-0.000770164	-0.00224113	0.00188121
-0.000770164	-0.00224113	0.00188121
-0.000553234	-0.00129671	0.000824965
-0.00206578	0.0115009	-0.00159688
-0.00219106	0.0128631	-0.00191458
-0.000691906	-0.00176255	0.00119779
-0.00224425	0.0132888	-0.00199095
-0.0012133	-0.0085754	-0.00429718
-0.00108104	-0.00490832	0.0359256
-0.000539548	-0.00121202	0.00073161
-0.000622897	-0.00152179	0.000999417
-0.000594601	-0.00146303	0.000983925
-0.000709973	-0.00182894	0.00126054
-0.00115928	-0.00831871	-0.00432279
-0.00097392	-0.00625671	-0.0028872
-0.00111692	-0.00512081	0.0377437
-0.00057329	-0.00135778	0.000870279
0.0503673	0.00205686	-0.000640539
-0.00097392	-0.00625671	-0.0028872
-0.00113482	-0.00810073	-0.00419513
-0.000455379	-0.000955646	0.000545296
-0.000987933	-0.00638988	-0.00296606
-0.000809505	-0.00241395	0.00207087
-0.000543245	-0.0012396	0.000761739
-0.000559035	-0.00131505	0.000838932
-0.00182299	0.0100322	-0.00142053
-0.00100669	-0.00437271	0.0305852
-0.00195545	0.0106618	-0.00145622
-0.00211707	0.0122818	-0.0018114
-0.000622922	-0.00152458	0.0010033
-0.0023068	0.0137728	-0.00207584
-0.00116712	-0.00815022	-0.00404833
-0.00208591	0.0120363	-0.00176787
-0.00111407	-0.00789769	-0.00406788
-0.000698654	-0.0019731	0.00162056
-0.000727195	-0.00207777	0.00172075
0.0605008	0.00262868	-0.000857998
-0.000914028	-0.00383473	0.0261088
-0.000569196	-0.00131702	0.000817446
-0.000574972	-0.00136672	0.000879001
-0.000913869	-0.00575529	-0.00261745
-0.000543245	-0.0012396	0.000761739
-0.001462	-0.0115065	-0.00644791
-0.000957525	-0.00611473	-0.00280887
-0.00109682	-0.00773357	-0.00396714
-0.000576517	-0.0013405	0.000835245
-0.000889705	-0.00276906	0.00246782
-0.00221429	0.0130471	-0.00194734
-0.000559035	-0.00131505	0.000838932
-0.00128099	-0.00960528	-0.00518308
-0.000677293	-0.001747	0.00121929
-0.00116712	-0.00815022	-0.00404833
-0.000455379	-0.000955646	0.000545296
-0.00207917	0.0119827	-0.00175832
-0.0021582	0.012589	-0.0018639
-0.00143572	-0.0112223	-0.00625485
-0.000756573	-0.00219355	0.0018374
-0.00140281	-0.0108543	-0.00599867
0.00166973	-0.00168396	0.00121541
-0.00199635	0.0113041	-0.00163446
-0.00128489	-0.00966229	-0.00522764
-0.00207917	0.0119827	-0.00175832
-0.000808385	-0.00238172	0.00201613
-0.000888755	-0.00552866	-0.0024886
-0.000816191	-0.00244072	0.00209825
-0.00203749	0.0116043	-0.00168478
-0.00194977	0.0106498	-0.00145777
-0.000640818	-0.00158124	0.00104663
-0.00111578	-0.0076488	-0.00374224
-0.00200315	0.0113556	-0.00164332
-0.000588003	-0.00140298	0.000904032
-0.000494657	-0.00109462	0.000657401
-0.00211707	0.0122818	-0.0018114
-0.000516873	-0.00114778	0.000687346
-0.00167403	0.00881217	-0.0011981
-0.00140311	-0.0108963	-0.00604553
-0.000661173	-0.00181921	0.00146091
-0.00209085	0.0120746	-0.00177459
-0.000553234	-0.00129671	0.000824965
-0.00100023	-0.00650142	-0.00302978
-0.000594601	-0.00146303	0.000983925
-0.000931212	-0.00587394	-0.00267059
-0.000516873	-0.00114778	0.000687346
-0.000677556	-0.00175122	0.00122466
-0.000642152	-0.00174822	0.00139244
-0.000677556	-0.00175122	0.00122466
-0.000809505	-0.00241395	0.00207087
-0.00135365	-0.010358	-0.00567795
-0.000691906	-0.00176255	0.00119779
-0.000778752	-0.00229472	0.00195153
-0.000383888	-0.000763077	0.000418299
-0.00081479	-0.00322412	0.0208247
-0.00130721	-0.00989818	-0.00538498
-0.000632494	-0.00155524	0.00102683
-0.000547471	-0.00125318	0.000772048
-0.0014431	-0.0113059	-0.00631352
-0.00125681	-0.00937494	-0.0050405
-0.00111763	-0.0079318	-0.00408897
-0.00104684	-0.00460438	0.0325057
-0.00188713	0.0102078	-0.00138755
-0.000547471	-0.00125318	0.000772048
-0.000784706	-0.00229982	0.00194137
-0.000416589	-0.000848573	0.000473429
-0.000981487	-0.00629098	-0.00289387
0.0554426	0.00233661	-0.000744995
-0.00064704	-0.00176627	0.00140971
-0.000604231	-0.001459	0.0009493
-0.000609509	-0.00148999	0.000981988
-0.00109682	-0.00773357	-0.00396714
-0.00160385	0.00811829	-0.00104479
-0.000638625	-0.00158304	0.0010538
-0.000594601	-0.00146303	0.000983925
-0.000563291	-0.00132863	0.000849336
-0.00188208	0.0104535	-0.00148993
-0.00140311	-0.0108963	-0.00604553
-0.00224425	0.0132888	-0.00199095
-0.00115928	-0.00831871	-0.00432279
-0.00107578	-0.00729538	-0.00354183
-0.00102322	-0.00456544	0.0329893
-0.00136912	-0.0105186	-0.00578377
-0.00111407	-0.00789769	-0.00406788
-0.000524283	-0.00120961	0.000760922
-0.00191159	0.0103549	-0.00140777
-0.00164816	0.00862713	-0.00116785
-0.000661173	-0.00181921	0.00146091
-0.000383888	-0.000763077	0.000418299
-0.00145104	-0.0113893	-0.00636903
-0.00102322	-0.00456544	0.0329893
-0.00111763	-0.0079318	-0.00408897
-0.00109763	-0.0050153	0.0368983
-0.0012133	-0.0085754	-0.00429718
-0.000594601	-0.00146303	0.000983925
-0.00229516	0.0136629	-0.00205408
-0.00104684	-0.00460438	0.0325057
-0.000611303	-0.00148376	0.000969639
-0.00199147	0.0109627	-0.0015097
-0.00139985	-0.0108612	-0.00602168
-0.000929055	-0.00589533	-0.00269859
-0.00140281	-0.0108543	-0.00599867
-0.00211707	0.0122818	-0.0018114
-0.000680481	-0.00176152	0.00123334
-0.000598474	-0.00144778	0.000944881
-0.000781098	-0.00228567	0.00192716
-0.000745982	-0.00215081	0.00179358
-0.000681705	-0.00177942	0.00126243
-0.00160385	0.00811829	-0.00104479
-0.000929055	-0.00589533	-0.00269859
-0.00108104	-0.00490832	0.0359256
-0.000627063	-0.0015382	0.00101398
-0.000481079	-0.00104496	0.000615795
-0.00209085	0.0120746	-0.00177459
-0.000524283	-0.00120961	0.000760922
-0.000661173	-0.00181921	0.00146091
-0.000672254	-0.00170749	0.00116555
0.0554426	0.00233661	-0.000744995
-0.000525707	-0.00117464	0.000706799
-0.000559035	-0.00131505	0.000838932
-0.00125103	-0.00931727	-0.00500362
-0.00140311	-0.0108963	-0.00604553
-0.000929055	-0.00589533	-0.00269859
-0.00069952	-0.00182476	0.00128449
-0.000627063	-0.0015382	0.00101398
-0.000598474	-0.00144778	0.000944881
-0.000521972	-0.00117343	0.000712732
-0.00060116	-0.0014908	0.00101438
-0.00215242	0.0125405	-0.00185489
-0.00200865	0.0113974	-0.00165052
-0.00194412	0.0109245	-0.00157102
0.0605008	0.00262868	-0.000857998
-0.000652634	-0.00162734	0.00108773
-0.0006378	-0.00157391	0.00104226
-0.000685619	-0.00179352	0.0012746
-0.000957525	-0.00611473	-0.00280887
-0.00211707	0.0122818	-0.0018114
-0.000838128	-0.00255752	0.00224587
-0.000416589	-0.000848573	0.000473429
-0.000547471	-0.00125318	0.000772048
-0.000778752	-0.00229472	0.00195153
-0.000563291	-0.00132863	0.000849336
-0.00211707	0.0122818	-0.0018114
-0.000563291	-0.00132863	0.000849336
-0.00164816	0.00862713	-0.00116785
-0.00112288	-0.00798346	-0.00412143
-0.000383888	-0.000763077	0.000418299
0.00158871	-0.0015812	0.0011309
0.0593653	0.002552	-0.000825221
-0.000897492	-0.00560574	-0.00253167
-0.000524283	-0.00120961	0.000760922
-0.00164816	0.00862713	-0.00116785
-0.000780547	-0.00305325	0.0195647
-0.00215706	0.0125767	-0.00186126
-0.000987933	-0.00638988	-0.00296606
0.0605008	0.00262868	-0.000857998
-0.000662755	-0.00169945	0.00118125
-0.00188713	0.0102078	-0.00138755
-0.00182299	0.0100322	-0.00142053
-0.000524283	-0.00120961	0.000760922
-0.000383888	-0.000763077	0.000418299
-0.000611303	-0.00148376	0.000969639
-0.00188713	0.0102078	-0.00138755
-0.000559035	-0.00131505	0.000838932
-0.000617485	-0.00149982	0.000979867
-0.000563291	-0.00132863	0.000849336
-0.00097392	-0.00625671	-0.0028872
-0.000524283	-0.00120961	0.000760922
-0.00167403	0.00881217	-0.0011981
-0.00211707	0.0122818	-0.0018114
-0.00167403	0.00881217	-0.0011981
-0.0006378	-0.00157391	0.00104226
-0.000636402	-0.00156923	0.00103853
-0.000586212	-0.00144389	0.000977841
-0.000745982	-0.00215081	0.00179358
-0.000383888	-0.000763077	0.000418299
-0.00200865	0.0113974	-0.00165052
-0.00060024	-0.00144608	0.000939296
-0.00126504	-0.0094576	-0.00509356
-0.002176	0.0127268	-0.001888
-0.000524283	-0.00120961	0.000760922
-0.000636402	-0.00156923	0.00103853
0.00123899	-0.00108368	0.000681382
-0.000592389	-0.00142697	0.000928053
-0.000416589	-0.000848573	0.000473429
-0.000416589	-0.000848573	0.000473429
-0.000602233	-0.00160804	0.00126296
-0.000524283	-0.00120961	0.000760922
-0.000888755	-0.00552866	-0.0024886
-0.000622897	-0.00152179	0.000999417
0.00158871	-0.0015812	0.0011309
-0.000524283	-0.00120961	0.000760922
-0.00113482	-0.00810073	-0.00419513
-0.000383888	-0.000763077	0.000418299
-0.000636402	-0.00156923	0.00103853
-0.000661173	-0.00181921	0.00146091
-0.000816191	-0.00244072	0.00209825
-0.0017283	0.00918223	-0.00125663
-0.000525707	-0.00117464	0.000706799
0.0503673	0.00205686	-0.000640539
-0.00219106	0.0128631	-0.00191458
-0.000945107	-0.00599632	-0.00273891
-0.000661173	-0.00181921	0.00146091
-0.000805838	-0.00485399	-0.00213293
-0.000888755	-0.00552866	-0.0024886
-0.000383888	-0.000763077	0.000418299
-0.00125103	-0.00931727	-0.00500362
-0.000632539	-0.00159955	0.00110075
-0.000574972	-0.00136672	0.000879001
-0.000524283	-0.00120961	0.000760922
-0.00058731	-0.00140901	0.000913183
-0.000383888	-0.000763077	0.000418299
-0.000524283	-0.00120961	0.000760922
-0.000563291	-0.00132863	0.000849336
-0.00209085	0.0120746	-0.00177459
-0.00189762	0.0105694	-0.00150963
-0.000524283	-0.00120961	0.000760922
-0.00058731	-0.00140901	0.000913183
-0.000553234	-0.00129671	0.000824965
-0.000645813	-0.0016207	0.00109676
-0.000525707	-0.00117464	0.000706799
-0.000383888	-0.000763077	0.000418299
-0.000559035	-0.00131505	0.000838932
-0.00057329	-0.00135778	0.000870279
-0.000559035	-0.00131505	0.000838932
-0.000525707	-0.00117464	0.000706799
-0.000555047	-0.00131534	0.000850484
-0.000888755	-0.00552866	-0.0024886
-0.000524283	-0.00120961	0.000760922
-0.000524283	-0.00120961	0.000760922
-0.000383888	-0.000763077	0.000418299
