# Supplementary material
Source: ML conference proceedings conference paper supplement (https://openreview.net/forum?id=oEtrDiFOFF)
Supplement: supplementary_material [file poincare_points.xlsx]

## Sheet: Sheet1
0.142058	0.98906
0.140392	0.988368
0.0439696	0.997609
0.101309	0.0682488
-0.283921	0.956077
0.977974	0.19879
-0.804246	0.592545
-0.319255	-0.945683
-0.0933084	-0.607242
0.0535982	0.99791
-0.0523605	0.696731
-0.419659	-0.903963
-0.487731	-0.837995
0.845112	0.529606
0.870545	0.21057
0.76826	-0.608671
0.801332	-0.250552
-0.42704	-0.902086
0.224069	-0.97168
0.119075	0.0266845
-0.57662	-0.815861
-0.433416	-0.69323
0.457136	-0.885222
0.445442	-0.877538
0.766484	-0.60556
0.258703	-0.961881
0.37523	-0.780219
-0.850954	-0.516967
-0.973709	0.187788
0.94129	-0.324267
0.938544	-0.326414
-0.339265	-0.920243
0.286748	-0.956152
-0.346802	0.935086
-0.329487	0.934838
-0.954409	0.295383
-0.943233	0.285246
-0.0507419	-0.995299
0.541133	-0.836944
0.390453	-0.810261
-0.143968	0.984848
0.322302	-0.945005
-0.810542	-0.559127
-0.418148	0.903607
0.854345	0.496052
0.853352	0.489155
-0.343194	-0.935369
0.0856236	0.99546
0.0429191	0.928767
0.50545	-0.843753
0.992573	-0.0196112
0.984854	-0.0333657
0.293716	0.954264
0.0566305	0.975493
-0.000831045	0.987963
0.584584	-0.80928
-0.312838	0.945154
-0.247598	0.926819
-0.973277	0.207339
-0.93969	0.252601
0.255886	0.963697
0.592455	0.172183
0.559163	0.157802
0.44146	-0.839489
-0.958742	0.279191
0.0955423	0.969277
-0.54074	-0.837876
-0.298044	0.944417
-0.76337	0.607791
0.975876	0.188732
-0.246214	0.967364
-0.119456	0.990592
-0.0531237	0.865531
0.31893	0.945945
-0.883597	-0.443855
-0.958156	0.255472
0.805284	0.574175
0.80336	0.568982
-0.550329	0.828908
-0.545027	0.829504
0.428908	-0.89936
0.451821	-0.868987
-0.307607	-0.823598
0.860641	-0.491526
0.975398	0.201636
0.798547	0.580767
0.388003	-0.915228
0.376257	-0.907665
-0.583623	-0.809766
-0.507509	-0.713572
0.803533	-0.584512
0.801046	-0.549504
-0.275561	0.959588
0.884898	-0.453373
0.885159	-0.451041
0.887265	-0.446677
0.88208	-0.453486
0.503819	-0.860251
-0.901913	0.421081
-0.852108	0.20354
0.874365	0.479295
0.860121	0.492755
-0.98742	0.0348358
-0.633781	-0.766913
-0.638023	-0.765061
0.978152	0.195062
0.970274	0.186782
0.398091	-0.914515
0.419817	-0.906477
0.472508	0.845533
0.481253	0.845502
0.96779	0.10613
0.53337	0.165389
0.00627296	0.954244
-0.0955932	0.983835
-0.0404498	0.832902
-0.743632	0.663547
-0.702196	0.623199
0.596763	0.19928
0.976042	0.207014
0.963967	0.191873
0.931348	-0.320501
0.848506	0.519416
0.84893	0.511768
-0.0406231	0.973507
0.878222	0.416292
-0.0729708	0.674645
0.0562623	0.716294
-0.223632	0.973634
-0.358263	-0.931477
-0.325427	-0.927939
-0.410476	-0.907506
-0.981916	-0.122633
-0.33165	0.94174
-0.657315	0.75054
-0.994133	0.0765385
0.995821	-0.0124491
0.318299	0.940497
-0.660686	-0.749112
-0.630771	-0.743233
0.60791	0.0466611
-0.125329	0.984885
0.517415	-0.854381
-0.80895	0.58189
-0.792398	0.578727
0.863402	0.501447
0.858589	0.505441
-0.564252	0.819357
-0.541346	0.827978
-0.516436	0.847641
0.915555	0.0648346
0.297989	-0.910897
-0.458604	-0.71573
0.106206	0.991921
0.940522	-0.31779
0.935664	-0.323395
0.394669	0.910599
-0.994561	-0.03327
-0.696979	-0.715115
-0.642867	-0.744139
-0.907379	0.412138
-0.894665	0.384245
-0.416755	-0.906258
0.508505	-0.860029
-0.440345	-0.790637
0.217519	0.973808
-0.331252	-0.941322
0.908927	-0.37867
0.907588	-0.377035
0.133752	0.984837
0.965459	-0.2338
0.958239	-0.233032
0.800481	-0.445001
0.858491	-0.402079
-0.990133	-0.089728
-0.979376	-0.120488
0.536402	0.835021
0.576954	0.750725
-0.94699	0.311587
-0.420191	-0.905883
-0.43793	-0.895006
-0.75679	-0.575477
0.431972	-0.890355
0.862043	0.500852
-0.908278	0.406523
-0.973987	0.219582
-0.0668789	0.984199
-0.125735	0.990465
-0.126712	0.990416
-0.509254	-0.698147
0.993332	-0.0738562
0.983993	-0.032705
-0.53827	-0.837154
-0.483613	-0.872621
0.528409	-0.847695
0.889341	-0.354397
0.992503	-0.0229758
0.583674	-0.809822
0.585257	-0.806599
-0.690722	-0.721512
0.247899	0.854605
-0.52344	-0.8493
-0.992947	0.078164
-0.532934	-0.831989
0.0395599	0.991643
0.485264	-0.872624
-0.982071	0.131933
0.669784	-0.739755
0.592249	0.789553
-0.824669	0.553208
0.893801	0.395512
-0.695133	-0.716416
0.29306	0.841355
0.976077	0.192179
0.976213	0.187754
0.633168	0.764279
-0.683411	0.726463
-0.655836	0.737743
-0.553546	-0.814851
0.122918	-0.988324
-0.957595	0.267693
0.979998	0.18343
0.00534258	0.999307
-0.642284	-0.764144
-0.646047	-0.761506
0.765042	0.579872
0.690333	0.39942
-0.872724	-0.421817
0.0152386	0.998831
0.379818	-0.92395
0.403127	-0.902508
0.607319	0.787052
0.124414	0.991338
0.181949	0.982497
0.163478	0.965399
-0.794661	-0.60264
-0.955818	0.288959
0.390765	-0.918942
0.216812	0.974281
0.809756	0.151718
0.939353	0.336254
0.935514	0.340886
0.621531	0.773391
-0.111687	-0.983639
-0.111165	-0.977895
-0.975069	0.204407
0.505087	0.126525
0.541538	0.117112
-0.296544	-0.952937
-0.323821	0.944162
-0.300779	-0.952019
0.256182	0.965109
0.0485182	0.998265
0.277034	-0.958953
-0.662131	-0.742835
-0.962674	0.258903
-0.355556	0.930477
-0.788996	0.604217
-0.246276	-0.957232
-0.281509	-0.936086
-0.318205	0.946919
-0.787439	-0.603707
0.907039	-0.378606
0.0658306	0.969363
-0.981635	-0.136088
-0.350095	0.92549
0.351953	-0.930387
-0.647018	-0.684033
-0.978955	-0.141992
0.961881	0.212023
0.964842	0.189499
-0.512416	-0.857975
0.849399	-0.520266
0.872149	-0.451823
-0.0479152	0.988588
0.663302	0.721792
0.894136	-0.147342
0.152639	-0.985252
0.159355	-0.983239
-0.918514	0.38818
0.955951	-0.248209
0.334957	0.939543
-0.626848	0.731231
-0.913684	0.388007
0.00196819	0.983879
0.43979	-0.896537
0.884888	-0.462631
0.967353	-0.127858
0.973432	-0.131311
-0.188752	0.980848
-0.901622	-0.0399216
-0.171476	0.983609
-0.0389359	0.998338
0.996589	-0.0316127
0.535672	0.837293
0.331546	0.939379
-0.951879	0.290972
0.202716	0.739761
-0.090892	-0.990845
0.467697	-0.823184
-0.965533	0.208231
-0.643347	0.76074
-0.576184	-0.811832
-0.551295	0.829875
0.456266	0.0165809
-0.127556	0.985407
-0.777831	0.623179
-0.755738	0.599137
-0.987093	-0.117588
-0.681048	-0.73116
0.582217	-0.810777
-0.495427	-0.864684
-0.501636	-0.856817
0.649167	-0.754425
0.071687	0.996803
0.389618	-0.918416
0.212451	0.974706
-0.465215	0.881468
-0.46822	0.878581
0.341495	-0.937235
0.164068	0.985318
0.321661	-0.943172
0.627423	0.773131
0.625575	0.766278
0.358226	-0.931765
0.421409	-0.803635
0.87953	-0.471663
-0.766416	0.639817
-0.913037	0.398415
0.594727	-0.80061
-0.365421	0.928483
0.980807	0.188827
-0.290599	-0.951505
-0.0689884	0.860179
-0.815438	0.574737
0.451228	-0.890712
-0.632501	0.764521
-0.639493	0.760704
-0.174272	0.982305
-0.530243	0.840346
-0.735919	-0.671028
-0.483716	-0.87196
0.615765	-0.781068
-0.974824	0.200271
0.856035	0.502182
-0.947152	0.306853
0.940717	-0.330244
0.0741836	0.995025
-0.981794	-0.128785
0.561406	-0.815828
-0.515846	-0.85502
0.281316	-0.958023
0.626719	0.776165
0.903222	-0.383027
0.456565	-0.858339
0.587642	0.0755573
0.992481	-0.0410887
-0.139082	0.987272
-0.760041	0.643258
-0.51694	-0.852957
-0.955743	0.283388
0.895541	-0.385231
0.52532	0.846392
0.536877	0.837794
-0.205097	0.974895
-0.990072	0.112755
-0.987061	0.113121
-0.787409	-0.613338
-0.0283754	0.997843
0.223228	0.973374
0.296135	0.94878
0.641274	0.142179
-0.0160357	0.997399
0.994884	-0.059701
0.989947	-0.0725157
0.990718	-0.0382443
0.990738	-0.0376802
0.126816	0.991372
0.980032	-0.13305
0.0640477	0.997103
0.932336	-0.322533
0.425164	-0.903373
0.458014	-0.887605
-0.132131	0.990345
-0.991522	-0.108162
-0.148352	0.983239
0.980598	-0.137051
0.32734	0.926531
-0.906165	-0.407297
-0.194673	0.979569
-0.0509631	0.995393
0.470557	-0.880843
-0.125022	0.991321
-0.995459	-0.0337635
-0.994544	-0.0324782
0.43435	-0.861747
0.28878	-0.9064
0.0704331	0.995181
0.561136	-0.821879
0.244385	0.967476
0.743902	0.626113
-0.990487	0.0373134
0.749413	0.467219
-0.466963	0.881113
0.836168	0.538231
0.824762	0.532615
0.976416	-0.169028
0.600028	-0.798384
0.934601	0.346195
-0.561268	-0.826357
0.972903	0.168945
0.479076	-0.876385
-0.510213	-0.827887
-0.858254	-0.506523
0.982619	0.180344
0.655065	-0.750428
-0.596891	-0.78653
0.042672	-0.992816
0.582834	0.126207
-0.897979	0.434826
0.302614	-0.950971
0.946566	0.30282
0.945944	0.302397
-0.425022	0.899752
-0.619385	-0.783942
-0.90306	0.418597
0.958846	-0.226723
0.954518	-0.230647
-0.452958	-0.889746
0.369584	-0.927932
0.931637	0.311728
0.930107	0.312302
-0.0568542	0.996425
-0.775296	0.609301
-0.0991841	0.992301
-0.742451	0.647515
-0.649608	0.751072
0.995813	-0.0430731
-0.280715	-0.957098
0.890257	0.4451
0.930626	0.308943
-0.780651	-0.619114
0.133933	0.989188
-0.259778	0.961374
-0.679127	0.731475
0.600693	0.782891
-0.542864	-0.837485
-0.630934	-0.770766
0.268012	-0.940633
0.979088	0.171395
-0.815603	-0.571941
0.954909	-0.276102
-0.732255	0.676525
0.0144783	0.998882
-0.976214	0.0627743
-0.451777	0.890519
-0.42906	-0.731983
-0.960603	-0.251722
-0.0608542	0.994561
-0.475752	-0.877654
0.928371	-0.363518
-0.671526	-0.736618
0.963054	0.204143
-0.985348	-0.114829
0.812942	-0.562953
-0.390051	-0.919124
0.862999	0.488856
-0.793636	0.6038
-0.972617	0.215372
0.931435	0.343247
0.544801	0.83291
-0.29388	0.951283
0.187773	0.97478
0.978691	0.196332
-0.751983	0.654872
-0.754093	0.653854
-0.981406	-0.121193
0.075744	0.980281
0.997684	-0.0170496
0.443533	-0.865024
-0.905778	0.402716
0.982222	0.174504
0.765759	-0.601903
-0.986956	0.117917
-0.637042	-0.770236
0.416928	0.901621
0.403106	0.9056
-0.955536	0.279527
0.662719	-0.742311
0.126338	0.99086
-0.947001	0.318148
-0.250151	0.690883
0.795059	0.600133
0.794408	0.599745
-0.761832	-0.64497
-0.763342	-0.642246
-0.901992	0.412834
0.987825	-0.0369061
-0.0535703	0.982863
0.257862	-0.962853
-0.95091	0.303949
-0.446537	0.891876
-0.593637	-0.803999
0.716588	0.421372
0.804985	0.55484
-0.219461	-0.973194
0.666756	-0.739723
-0.0672146	0.995223
0.418069	-0.858726
0.966686	0.230049
0.958282	0.203094
-0.00925021	0.996038
0.163535	-0.979477
0.46691	-0.878981
0.930957	0.312271
-0.658368	0.692993
0.619297	0.774998
0.941397	0.316966
-0.347342	-0.920879
0.934912	-0.321988
-0.239647	-0.964669
-0.819553	0.562895
-0.298392	0.951125
0.625975	0.776773
-0.24992	0.961933
0.339023	-0.934178
0.038033	0.988045
0.991915	-0.0193969
0.992593	-0.0198194
0.177083	0.981857
-0.71344	-0.699301
-0.0772263	0.989151
0.817649	-0.55035
0.815058	-0.55595
-0.760849	0.637681
0.339913	-0.867582
-0.930389	0.219305
0.936404	-0.321978
-0.849069	-0.522644
-0.0281422	0.998697
0.622771	-0.780746
0.313222	-0.942405
-0.685776	0.72381
0.985282	0.153553
-0.828505	0.546883
0.990944	-0.0740442
0.593206	0.793125
0.144191	-0.982802
-0.941974	0.326985
-0.639088	-0.722753
-0.625786	-0.76087
-0.567319	-0.819486
-0.971279	0.213089
-0.965072	0.209975
-0.593081	-0.798094
-0.514074	0.851086
-0.280638	-0.865911
0.996439	-0.0228684
-0.63376	-0.772689
-0.20925	0.97375
0.00367337	0.999179
0.191341	-0.978624
-0.326496	0.915342
-0.77481	-0.623448
-0.408673	-0.897338
0.727005	0.0833302
-0.075765	0.996196
-0.00142559	0.999059
-0.820563	-0.568326
0.0338102	0.99735
-0.754666	0.648895
0.313263	0.937091
0.623908	0.772162
-0.281833	-0.956457
0.228751	-0.971057
-0.543411	-0.83847
0.411875	-0.910264
0.0401446	0.996437
-0.894208	-0.436442
-0.898301	-0.42476
-0.940203	0.297288
-0.698864	-0.707857
-0.98763	-0.140297
0.509229	-0.858224
0.0533911	-0.995431
-0.215364	0.975226
-0.318923	-0.945042
-0.143096	-0.986537
-0.992046	-0.0841987
0.555384	-0.825989
0.291325	0.940772
-0.847597	0.51632
-0.855557	0.485551
0.968417	-0.224602
-0.645491	-0.763014
-0.746108	0.65733
0.0557321	0.99469
0.934813	-0.342801
0.139984	0.989068
0.380731	-0.921721
0.933727	0.347217
0.275834	-0.937737
0.470658	-0.880336
0.577883	0.808543
0.36223	-0.919432
0.935248	0.336333
-0.646725	-0.754281
0.613852	-0.784943
0.659207	0.0294731
0.499904	0.85661
0.621066	0.195585
0.884392	-0.456279
0.938619	-0.32772
0.835934	-0.543953
0.503757	-0.862457
-0.243484	0.962092
0.811128	0.568732
0.86017	0.505623
0.96372	-0.240625
0.355438	0.9312
-0.727258	0.664304
-0.064249	0.995629
0.890365	-0.446048
0.877723	-0.465741
0.968285	0.216278
0.631482	0.179949
-0.563531	0.813392
-0.692109	0.718842
0.111298	0.788464
-0.676177	-0.734093
-0.97702	0.202639
-0.524669	-0.841592
0.175315	0.983428
0.562437	-0.821965
-0.664515	0.740687
-0.209278	0.974063
0.994396	-0.0463091
0.993969	-0.0425588
0.184316	0.981317
-0.0503808	-0.994201
0.985229	0.153588
-0.784733	-0.617578
0.211115	-0.972779
0.885955	-0.454077
-0.991077	0.0436349
0.847955	-0.439725
-0.205919	0.976961
-0.66565	-0.729718
-0.657592	0.747281
-0.242473	0.966482
-0.0700298	0.944029
0.163927	0.985812
-0.668817	-0.742293
0.258752	-0.957764
-0.178368	0.669356
-0.94256	0.325717
0.951483	0.12762
0.554335	-0.830241
0.857273	-0.404568
-0.139618	0.946587
0.0901974	0.990973
0.514515	-0.855831
0.169488	0.984419
-0.129444	-0.987115
0.934544	0.342262
-0.773049	0.632218
-0.140024	0.984169
0.805097	0.341831
0.827476	0.539815
-0.220407	-0.971748
0.936501	0.341075
-0.899756	-0.40162
-0.0444876	0.993775
0.790532	-0.597289
0.868357	0.489473
0.562425	0.822984
0.066707	0.995774
-0.771957	-0.632561
-0.605591	-0.774125
-0.656725	-0.752872
-0.353874	0.933883
0.550259	0.350781
-0.310045	0.949012
0.505997	-0.853225
0.453451	-0.877008
-0.129499	0.98859
0.861052	-0.420683
-0.509385	-0.85911
0.370786	-0.9257
-0.640417	0.762251
-0.337936	0.938349
-0.98903	-0.120059
0.119762	0.991425
-0.265109	0.962702
-0.241184	0.96974
-0.787879	0.612301
0.0463794	-0.994826
0.00126147	0.998647
0.967322	-0.206144
0.173203	-0.982316
-0.977169	0.189301
0.499475	-0.864852
-0.493044	-0.867968
-0.299709	0.952514
-0.4931	-0.86887
0.0903823	0.985672
0.516261	0.842443
0.0259703	-0.991136
0.919773	0.37821
0.891156	-0.446669
-0.0149119	0.998796
-0.0534083	0.997967
0.639928	0.755356
-0.488897	0.86978
0.464489	0.866538
0.028356	0.998879
-0.80804	0.579296
0.952433	-0.0122626
0.933196	0.315335
-0.429834	-0.816288
0.626036	-0.776715
0.816626	0.345346
-0.70692	0.603442
0.261533	0.961652
0.397937	-0.914504
-0.447368	-0.892626
-0.557283	0.815078
-0.108715	-0.981139
-0.059689	0.997033
0.59594	-0.787815
0.915599	0.359391
0.995635	-0.0168689
0.0827898	0.99619
0.0316977	0.99759
0.950184	-0.204964
0.961085	-0.191151
-0.257198	0.965633
0.326356	-0.943794
-0.243902	-0.967457
0.992798	0.0794732
0.992349	-0.0339777
-0.96752	0.237306
-0.944826	0.321174
0.439257	-0.791991
0.895461	-0.437736
-0.984022	-0.13711
-0.261004	0.963912
-0.0404364	0.997981
0.0315825	0.998574
0.673608	0.732971
0.670922	0.729595
-0.621708	-0.78166
0.834339	-0.532404
-0.404392	0.909492
0.809783	0.578172
0.0169419	-0.995359
0.0356854	0.996425
0.792222	0.584001
-0.102937	0.992936
0.571449	0.813343
0.573348	0.811857
-0.745117	-0.661844
0.694377	0.367314
-0.704053	0.706821
-0.966989	0.227583
-0.72727	0.67067
-0.731114	0.678469
-0.682555	0.727208
0.52519	0.0930835
0.156349	-0.983635
-0.429463	0.899955
-0.992846	0.0761948
0.701152	-0.705745
0.98203	-0.15462
-0.222678	0.964906
-0.929142	0.35404
0.933092	-0.0558636
0.991671	-0.0680515
0.571496	0.815682
0.043468	0.997877
-0.670145	-0.740339
-0.543105	0.831464
0.993421	-0.0192688
0.812354	0.573913
-0.331305	0.941145
-0.920315	0.374178
0.99085	0.0828657
0.516486	0.212063
-0.81991	0.568851
-0.453465	-0.890014
-0.665688	0.743353
-0.944043	-0.276217
0.893084	-0.439803
0.209581	0.969272
-0.753955	0.641263
0.913456	-0.198284
0.976366	0.181526
0.497477	-0.862839
-0.45478	-0.881474
-0.706178	-0.699547
-0.817425	-0.553336
0.0419223	-0.991624
-0.256783	-0.962931
0.65681	0.726774
0.661715	0.734239
-0.178617	-0.979045
0.0596165	0.997296
0.941715	-0.316139
-0.88449	-0.442549
0.832763	-0.542477
0.365632	0.927159
-0.1909	0.951108
-0.834835	0.536335
-0.810821	0.572254
0.412261	-0.909431
-0.166514	0.983957
0.872389	0.478038
-0.65979	-0.750528
-0.967549	0.242716
0.978306	0.0439976
0.967465	0.0269168
0.879955	-0.461862
-0.077801	0.996191
0.811776	-0.561653
0.949126	0.300737
-0.0845302	0.991273
-0.22905	0.947304
0.991644	-0.0384471
-0.238033	0.941232
-0.9086	0.404499
0.34301	0.919135
0.967982	-0.225303
0.92759	-0.353815
0.936207	0.342174
-0.709497	0.666143
0.513053	0.85341
-0.267452	-0.961262
-0.870876	-0.482581
0.961159	-0.264042
-0.982462	-0.144953
-0.924918	0.36534
0.750518	-0.52588
-0.599411	-0.789422
-0.916554	0.383702
0.968367	0.205893
-0.994552	0.0380864
0.254091	-0.965271
0.474104	-0.877411
-0.805556	0.52906
-0.791749	0.588247
-0.955921	0.282904
-0.620655	-0.782935
-0.483725	-0.86461
0.659371	0.748543
-0.644111	0.759
-0.911652	-0.394323
0.491931	0.827001
0.690534	0.714574
0.971761	0.220692
0.835768	0.0892218
0.893684	0.439318
0.97466	0.0260556
-0.0215874	0.998993
0.230845	-0.958554
-0.722526	-0.600273
-0.905023	0.417889
0.962881	-0.219864
0.290667	-0.878253
-0.200914	0.977487
0.706189	0.506167
-0.396711	-0.87859
0.782268	0.0715167
-0.727	0.679752
-0.408494	0.8925
0.989754	-0.0353308
0.95602	-0.26592
0.385419	0.919275
0.820928	0.543762
0.890354	-0.378302
-0.785152	0.6124
0.826199	-0.546312
0.854356	0.515255
0.817794	0.558772
0.812914	0.556556
0.206835	-0.966883
0.955815	-0.237705
0.688854	0.717769
-0.664413	0.739633
0.949252	-0.224511
-0.100027	0.951133
0.632063	0.285754
-0.0325962	0.991744
0.959921	-0.26401
0.977107	-0.190156
-0.657097	0.714063
0.935066	-0.345527
0.583561	0.80169
0.994904	-0.0368712
0.99467	-0.0404045
0.688178	-0.721039
0.88595	-0.451333
0.812226	-0.575298
0.906551	0.373809
0.943905	0.305912
0.99478	-0.0201705
0.151142	0.984692
-0.948894	-0.0604286
-0.477928	0.87563
0.88777	-0.456333
0.882348	-0.467408
0.878933	-0.467508
-0.739151	-0.649425
-0.930995	0.351219
-0.922436	0.350008
0.975522	0.023263
0.456768	-0.880964
-0.715937	-0.695673
0.946511	-0.314988
-0.602021	-0.79737
-0.811062	0.5789
0.978643	0.156922
0.806642	0.568902
0.910621	-0.379268
0.777395	0.384725
0.935271	0.340161
-0.467185	0.878082
-0.549608	0.816655
0.978426	0.166396
0.880961	0.421273
0.995102	0.0102673
-0.536854	0.833668
-0.346136	0.867625
-0.960772	-0.254674
0.562056	0.820832
-0.948281	0.297827
0.946439	0.304107
0.980608	0.0329723
-0.182644	-0.970011
0.85109	0.512537
0.254601	-0.964623
-0.535425	-0.843262
0.859118	-0.492936
-0.642517	-0.762032
-0.736493	0.670993
-0.480997	-0.875637
0.407541	0.909913
-0.982976	0.162434
-0.919557	0.381491
0.997371	-0.00467924
0.892824	0.438148
0.943982	0.308992
0.859912	-0.377
-0.564742	0.82221
0.945075	0.298304
0.113273	0.992599
-0.522916	0.844489
0.432673	0.897188
0.935867	0.313025
-0.984622	-0.124143
-0.553914	-0.831002
0.968064	-0.138078
0.284841	0.938159
-0.914545	-0.0924594
-0.735741	0.670833
-0.960577	-0.2516
-0.280569	-0.922843
-0.74666	-0.64992
-0.0715205	0.994431
-0.89385	0.440678
-0.209047	0.976486
0.79452	0.599975
-0.306936	-0.950201
-0.122294	0.990871
-0.368428	-0.926147
-0.921651	0.359494
0.527976	0.77797
-0.957351	0.267639
-0.336762	-0.93883
0.615471	-0.782373
0.778536	-0.615423
-0.630544	0.771656
-0.342338	-0.937783
0.764366	-0.537681
0.95032	0.276368
-0.529899	-0.79784
0.801952	0.558073
-0.133562	-0.987396
0.0868399	0.993981
-0.995045	0.00955027
-0.440842	-0.895985
0.955578	0.120882
0.640864	0.76207
0.74423	0.333773
0.504706	0.843591
0.789898	0.576485
0.551704	0.160048
-0.983423	0.120429
0.57451	0.151657
-0.948362	0.301522
-0.263251	0.958346
0.944005	-0.316536
-0.978112	0.181929
-0.962294	-0.170493
0.992487	0.0787992
-0.239162	0.961654
0.958669	-0.238478
0.930704	0.328745
0.193744	0.978563
0.33	0.938028
-0.411885	0.908328
0.872761	0.480463
0.631915	-0.763261
0.927305	0.309992
-0.912718	0.40135
0.787818	0.6051
-0.694773	0.664125
0.992126	-0.0774272
-0.990498	0.086817
0.772013	-0.596483
0.953333	-0.291304
0.428184	0.899856
0.0163574	-0.993225
0.923388	-0.364907
0.817615	0.475703
0.738979	-0.626471
-0.185406	-0.976889
0.103834	0.993093
-0.615716	-0.786296
-0.468734	0.875357
-0.694928	0.714721
0.964797	0.24156
-0.302854	0.948759
0.401206	0.908726
0.967009	-0.0633031
0.275423	-0.959123
-0.906898	-0.410712
-0.983129	0.0445153
-0.98888	-0.0360044
0.17265	0.979327
0.970193	0.233631
-0.415639	0.904808
0.965591	0.187731
-0.797407	0.601027
0.73893	0.609767
-0.577772	-0.814631
0.865538	0.489903
0.913054	-0.3708
0.525928	-0.844367
-0.0121925	0.99744
0.570499	0.798809
-0.225752	0.97359
-0.383189	-0.910205
0.539451	0.211033
0.788129	-0.593447
-0.899906	0.42388
-0.922343	0.362215
0.877804	-0.465395
0.0265731	-0.994252
0.707464	0.69795
0.968429	0.208999
0.781315	-0.615323
0.784248	0.604484
-0.426886	-0.903232
0.934905	-0.0280168
-0.994201	0.0174299
0.936585	0.343289
0.990906	-0.100297
0.830297	0.529105
0.868208	0.433784
-0.165057	0.972663
0.119974	0.984457
0.591311	0.778424
0.514363	-0.100484
0.778465	-0.61531
0.854115	-0.478231
0.913972	0.372404
0.849752	-0.518628
-0.763186	-0.640014
-0.250939	-0.966013
-0.27576	-0.952201
0.996845	-0.0153478
0.923687	-0.360875
0.826733	-0.558135
0.877157	-0.458371
-0.53718	0.83053
-0.462187	-0.87187
-0.991572	-0.0814127
0.786863	0.60702
0.925679	0.345595
-0.970635	0.231432
0.979615	-0.134519
-0.483268	-0.859933
0.981508	-0.144479
-0.902802	-0.41462
-0.461634	0.882516
0.848274	0.38432
0.794878	0.600009
0.991778	-0.0736044
-0.713371	0.585455
0.97977	-0.155722
-0.903494	-0.420241
0.991725	0.0762973
-0.780764	-0.621897
0.586622	0.805699
0.994331	-0.0240693
-0.90231	-0.0950597
0.385473	-0.87871
-0.130413	-0.964104
0.913961	0.227949
-0.966197	-0.188101
0.914952	-0.367691
0.344355	-0.93704
0.955084	-0.193179
0.7703	-0.595146
0.775081	-0.505826
-0.547713	0.831958
0.972049	-0.0255842
-0.128231	-0.983699
-0.408848	-0.905047
-0.102331	-0.991711
0.821793	-0.56109
0.820785	-0.546711
0.851891	-0.518152
-0.917956	0.371616
0.899973	-0.07294
-0.260735	-0.963581
0.778671	-0.602165
-0.153157	0.902966
-0.502739	-0.855676
0.96815	0.12376
0.805574	-0.581155
-0.993777	-0.0311293
0.935361	-0.258458
-0.969045	-0.211401
-0.966975	-0.20988
-0.98239	0.122929
0.847196	-0.223751
0.562778	0.784277
0.911935	-0.38751
0.794823	0.601402
0.980051	0.0817753
-0.402436	0.884355
-0.980629	-0.0739291
0.811488	-0.565057
-0.990495	0.0119858
-0.962054	0.265035
-0.108772	-0.985923
0.87488	0.462278
0.988043	-0.0175328
-0.70565	-0.704379
-0.719158	0.594672
-0.992466	0.0305172
-0.976376	0.0989604
0.488633	0.849958
-0.982082	-0.044641
-0.169369	0.973858
0.756447	0.200128
0.834224	-0.340834
0.950472	-0.08163
0.907668	-0.348999
0.882502	0.194062
0.93129	-0.184644
0.98019	-0.166146
-0.437584	-0.89766
-0.840623	-0.532782
0.969956	-0.166899
0.896552	-0.406436
0.898894	-0.204127
0.938693	0.334537
0.826112	0.546682
-0.957181	-0.0178708
0.960496	-0.0903758
0.971591	-0.105687
0.964693	-0.106041
0.82481	0.546222
0.92038	0.37545
0.523659	0.835306
0.945736	0.0965469
0.943002	0.268222
0.756665	0.542436
